1

2

3

4 Chm7 and Heh1 form a nuclear envelope subdomain for nuclear pore complex quality

5 control

6

7 Brant M. Webster<sup>1,\*</sup>, David Thaller<sup>1,\*</sup>, Jens Jäger<sup>1</sup>, Sarah E. Ochmann<sup>1</sup> and C. Patrick

8 Lusk<sup>1#</sup>

9

10

11

12

13 <sup>1</sup>Department of Cell Biology, Yale School of Medicine, New Haven, CT

14

15 <sup>#</sup>Correspondence to C. Patrick Lusk: [patrick.lusk@yale.edu](mailto:patrick.lusk@yale.edu)

16

17

18 \*These authors contributed equally to this work.

19

20

21

22

1 **Abstract**

2 Mechanisms that ensure the integrity of the nuclear envelope rely on membrane  
3 remodeling proteins like the ESCRTs and the AAA ATPase Vps4, which help seal the  
4 nuclear envelope at the end of mitosis and prevent the formation of defective nuclear  
5 pore complexes (NPCs). Here, we show that the integral inner nuclear membrane  
6 proteins Heh1 and Heh2 directly bind the ESCRT-III, Snf7, and the ESCRT-II/III  
7 chimera, Chm7, in their 'open' forms. Moreover, Heh1 is required for Chm7-recruitment  
8 to the nuclear envelope. As Chm7 accumulates on the nuclear envelope upon blocks to  
9 NPC assembly, but not to nuclear transport, interactions between ESCRTs and the Heh  
10 proteins might form a biochemically distinct nuclear envelope subdomain that delimits  
11 regions of assembling NPCs. Interestingly, deletion of *CHM7* suppresses the formation  
12 of the storage of improperly assembled NPC compartment prevalent in *vps4Δ* strains.  
13 Thus, our data support that the Heh1-dependent recruitment of Chm7 is a key  
14 component of a quality control pathway whose local regulation by Vps4 and the  
15 transmembrane nup, Pom152, prevents loss of nuclear compartmentalization by  
16 defective NPCs.

17

18

19

20

## 1 **Introduction**

2           It is well established that the nuclear envelope (NE) in multicellular eukaryotes  
3 undergoes a dramatic breakdown and reformation during cell division (Wandke and  
4 Kutay, 2013), and it is emerging that the two membranes of the NE undergo extensive  
5 remodeling during interphase as well (Hatch and Hetzer, 2014; King and Lusk, 2016).  
6 Classic examples are the insertion of massive protein assemblies like nuclear pore  
7 complexes (NPCs)(Rothballer and Kutay, 2013) and the yeast centrosome (spindle pole  
8 body; SPB), but now extend to the nuclear egress of ‘mega’ ribonucleoprotein particles  
9 through a vesicular intermediate in the NE lumen/perinuclear space (Speese *et al.*,  
10 2012; Jokhi *et al.*, 2013) and the degradative clearance of nuclear/NE contents by  
11 autophagy pathways that act specifically at the NE (Roberts *et al.*, 2003; Dou *et al.*,  
12 2015; Mochida *et al.*, 2015). Understanding the molecular mechanisms that drive the  
13 membrane remodeling necessary for NE homeostasis is a critical goal for the field,  
14 particularly with the ever-growing links between disruptions in nuclear  
15 compartmentalization and human disease (Hatch and Hetzer, 2014; Burke and Stewart,  
16 2014).

17           To exemplify the necessity of defining the molecular machineries capable of  
18 remodeling the NE, there is a lack of clarity regarding the fundamental mechanism of *de*  
19 *novo* NPC assembly. To build the massive ~50 MD yeast or ~100 MD human NPC  
20 requires the assembly of ~30 proteins (nucleoporins/nups) in multiple copies such that  
21 an individual NPC requires upwards of 500 proteins in yeast (Alber *et al.*, 2007) and  
22 perhaps twice as many in human cells (Bui *et al.*, 2013; von Appen *et al.*, 2015). This  
23 requires remarkable spatiotemporal control over hundreds of proteins that converge at a

1 NE domain competent for NPC assembly; what defines a biogenesis site remains  
2 unclear but it might require local changes in Ran-GTP levels (Ryan and Wentte, 2003;  
3 Walther *et al.*, 2003; D'Angelo *et al.*, 2006), nup binding to integral inner nuclear  
4 membrane (INM) proteins (Talamas and Hetzer, 2011; Yewdell *et al.*, 2011), or to  
5 chromatin (Franz *et al.*, 2007; Rasala *et al.*, 2008; Rotem *et al.*, 2009; Doucet *et al.*,  
6 2010), or changes in the properties of the membrane itself, perhaps by altering lipid  
7 composition (Schneiter *et al.*, 1996; Scarcelli *et al.*, 2007; Hodge *et al.*, 2010; Lone *et al.*,  
8 2015). Local changes in lipid composition might also facilitate INM and outer nuclear  
9 membrane (ONM) fusion, but it is generally thought that protein-mediated membrane  
10 remodeling would ultimately be required to form a pore.

11 As yet, no single dedicated membrane bending or fusion machinery has been  
12 identified that drives nuclear pore formation but an emerging theme is the cooperative  
13 action of nups containing amphipathic helices or reticulon domains capable of  
14 recognizing or generating membrane curvature (Marelli *et al.*, 2001; Drin *et al.*, 2007;  
15 Dawson *et al.*, 2009; Doucet *et al.*, 2010; Chadrin *et al.*, 2010; Vollmer *et al.*, 2012;  
16 2015; von Appen *et al.*, 2015; Mészáros *et al.*, 2015; Floch *et al.*, 2015; Casey *et al.*,  
17 2015). Interestingly, budding yeast require the membrane bending and scission  
18 Endosomal Sorting Complexes Required for Transport (ESCRT)-III proteins to ensure  
19 formation of functional NPCs, raising the possibility that an established multifunctional  
20 membrane remodeler might yet be required during pore biogenesis (Webster *et al.*,  
21 2014; Webster and Lusk, 2015). Similarly, recent work from *C. elegans* suggests that  
22 the ER luminal AAA+ torsin orthologue OOC-5 might contribute to NPC assembly  
23 (VanGompel *et al.*, 2015). The concept that torsin, or one of its substrates, might be

1 able to remodel membranes is supported by its role in the fission of INM evaginations  
2 during intraluminal bud formation necessary for mega-RNP egress (Jokhi *et al.*, 2013),  
3 and likely other yet to be defined processes (Goodchild *et al.*, 2005; Rose and  
4 Schlieker, 2012).

5 The membrane scission mechanism requiring torsins is topologically similar to  
6 that carried out by the ESCRTs; ESCRTs have been implicated in an ever-growing list  
7 of cellular processes that require a membrane scission step (Hurley, 2015). While the  
8 precise mechanism of membrane scission remains to be fully understood, in all cases it  
9 is thought that it will require the remarkable capacity of ESCRT-III's to form polymers  
10 that generate and stabilize negative membrane curvature as membrane scaffolds  
11 (Ghazi-Tabatabai *et al.*, 2008; Lata, *et al.*, 2008; Hanson *et al.*, 2008; Saksena *et al.*,  
12 2009; Henne *et al.*, 2012; Shen *et al.*, 2014; Cashikar *et al.*, 2014; Chiaruttini *et al.*,  
13 2015).

14 There are multiple ESCRT-III proteins in budding yeast and multicellular  
15 eukaryotes with yeast Snf7 and its mammalian orthologue CHMP4B being the most  
16 abundant (Teis *et al.*, 2008); ESCRT-III's are thought to share a similar structure with a  
17 basic core domain of four alpha helices whose assembly into a homo or hetero-polymer  
18 is autoinhibited by acidic helices that fold back onto the core (Muzioł *et al.*, 2006;  
19 Zamborlini *et al.*, 2006; Shim *et al.*, 2007; Kieffer *et al.*, 2008; Lata *et al.*, 2008; Xiao *et*  
20 *al.*, 2009; Bajorek *et al.*, 2009; Tang *et al.*, 2015). A key question therefore is how  
21 ESCRT-III's come together to form potentially unique filaments with context-dependent  
22 biophysical properties (Cashikar *et al.*, 2014). Such flexibility is exceptionally highlighted  
23 by the unexpected discovery that the ESCRT-III's IST1 and CHMP1B form a

1 heteropolymer capable of scaffolding tubules with positive membrane curvature  
2 (McCullough *et al.*, 2015).

3 *In vitro* and *in vivo* analyses predominantly of the endocytic ESCRT arm have  
4 defined a step-wise activation of Snf7 by the sequential binding of the ESCRT-II, Vps25,  
5 to the ESCRT-III Vps20, which in turn releases the autoinhibition of Snf7 to induce  
6 filament formation (Teis *et al.*, 2008; Im *et al.*, 2009; Saksena *et al.*, 2009; Teis *et al.*,  
7 2010; Henne *et al.*, 2012). Bro1-domain containing proteins like ALIX are also capable  
8 of activating Snf7 polymerization although through a distinct Snf7-binding interface  
9 (McCullough *et al.*, 2008). The ESCRT-III's Vps2 and Vps24 are thought to alter the  
10 Snf7 filament helicity (Henne *et al.*, 2012) and recruit the AAA-ATPase Vps4, which  
11 stimulates ESCRT-recycling in a manner that might directly contribute to membrane  
12 scission (Teis *et al.*, 2008; Saksena *et al.*, 2009; Adell *et al.*, 2014).

13 Interestingly, Vps25 and Vps20 were absent from the genetic and functional  
14 analysis of ESCRT-III-mediated NPC assembly quality control, raising the possibility  
15 that Snf7 activation at the NE might require specific factors distinct from those at  
16 endosomes (Webster *et al.*, 2014). As the recruitment of ESCRT-III's to different cellular  
17 compartments requires site-specific adaptor molecules (McCullough *et al.*, 2013; Hurley,  
18 2015), it is possible that the adaptors themselves might contribute to the activation  
19 mechanism. This concept might be particularly relevant at the NE as the 'orphan'  
20 ESCRT, CHMP7 (Horii *et al.*, 2006), was recently shown to help recruit other ESCRT-  
21 III's to seal NE holes at the end of mitosis (Vietri *et al.*, 2015). As CHMP7 in metazoans  
22 and in yeast (Chm7) might be a chimera of an ESCRT-II and ESCRT-III domain (Bauer

1 *et al.*, 2015), a compelling hypothesis is that it might supplant the role of Vps25 and  
2 Vps20 at the NE.

3         The first identification of a role for ESCRTs at the NE was in budding  
4 yeast(Webster *et al.*, 2014)(aided by a genetic analysis in fission yeast (Frost *et al.*,  
5 2012)), which undergo a closed mitosis where the NE remains intact throughout the cell  
6 cycle. Snf7 and Vps4 were implicated in a surveillance pathway that ensures the  
7 assembly of functional NPCs, in part by preventing the formation of the “storage of  
8 improperly assembled nuclear pore complexes” (SINC) compartment, which is most  
9 prevalent in *vps4Δ* strains (Webster *et al.*, 2014). The SINC encompasses a NE  
10 subdomain where defective NPCs are aggregated during assembly and subsequently  
11 retained in mother cells to ensure daughter nuclear compartmentalization (Webster *et*  
12 *al.*, 2014). This study fits into a broader theme of emerging work supporting  
13 mechanisms that monitor NPC functionality and prevent the inheritance of defective  
14 NPCs (Colombi *et al.*, 2013; Makio *et al.*, 2013); the importance of understanding these  
15 mechanisms is reinforced by the observed loss of nups that occurs with age in rat brain  
16 neurons (D'Angelo *et al.*, 2009; Toyama *et al.*, 2013) and in budding yeast (Lord *et al.*,  
17 2015).

18         Here, we further explore the mechanism of ESCRT-III function at the NE in  
19 budding yeast by focusing on the understudied ESCRT-II/III chimera, Chm7. Through a  
20 detailed analysis of the biochemical and genetic determinants of Chm7 localization at  
21 the NE, we uncover a previously undiscovered NE subdomain that requires Heh1 and  
22 expands upon NPC misassembly to form the SINC. Our data are consistent with the  
23 interpretation that the local regulation of Chm7 is required for NPC quality control.

## 1 **Results**

### 2 **Heh2 directly binds to Chm7 and Snf7**

3           We previously reported that Heh2 binds Snf7 through its N-terminal Lap2-emerin-  
4 MAN1 (LEM) containing domain, but it was not clear whether this interaction is direct  
5 (Webster *et al.*, 2014). To test this, we produced a recombinant heh2(1-308) that  
6 encompasses the entire extralumenal N-terminal domain of Heh2 (Figure 1A) and  
7 assessed binding to recombinant bead-bound GST-Snf7. We also tested binding to  
8 GST-snf7-N (Figure 1B), which encodes the ESCRT-III ‘core’ and lacks the acidic C-  
9 terminal auto-inhibitory helices thus mimicking its “open” active form. As shown in  
10 Figure 1C, we observed specific binding of heh2(1-308) and the GST-snf7-N, but not to  
11 full length Snf7. Despite the apparent specificity to the snf7-N construct over both GST  
12 and GST-Snf7, we were concerned that the sub-stoichiometric heh2(1-308) binding  
13 might reflect a weak interaction that could be dislodged by non-specific competition *in*  
14 *vivo*. However, we reproduced the direct (and specific) binding of heh2(1-308) to GST-  
15 snf7-N within an *in vitro* transcription translation mix where non-specific competitors are  
16 in abundance, suggesting this interaction is biologically relevant (Figure 1D). Further, by  
17 testing a series of truncations of the Heh2 N-terminal domain, we narrowed the binding  
18 interface between Heh2 and Snf7 to the N-terminal ~100 amino acids, which  
19 encompasses the LEM domain (Figure 1D); we were unable to test binding sufficiency  
20 with the LEM domain as we failed to produce a stable polypeptide. We nonetheless  
21 conclude that Heh2 directly binds to Snf7 thus providing a mechanistic basis for how  
22 this E-III is recruited to the NE.



1           The mammalian orthologue of Chm7 helps seal NE holes at the end of an “open”  
2           mitosis (Vietri *et al.*, 2015) suggesting the existence of NE-specific adaptors that have  
3           not yet been defined capable of recruiting Chm7. We therefore tested whether Heh2  
4           could directly interact with Chm7 as well. Interestingly, secondary structure and  
5           homology modeling support that Chm7 is a chimera of an ESCRT-II and ESCRT-III  
6           subunit, although the atomic structure remains to be solved (Figure 1-figure supplement  
7           1;(Bauer *et al.*, 2015)). Therefore, to test binding with heh2(1-308), we produced  
8           recombinant forms of Chm7 (Figure 1E) in addition to isolated ESCRT-II-(chm7-N) and  
9           ESCRT-III-like (chm7-C) domains. We also generated a C-terminal truncation that  
10          would model the “open” form of the potential ESCRT-III domain (chm7-CΔC).  
11          Remarkably, heh2(1-308) directly and specifically interacted with the Chm7 ESCRT-III  
12          domain in a manner analogous to its binding to Snf7, i.e. it bound to the ESCRT-III  
13          domain only in its putative “open” conformation (Figure 1F). These data reinforce the  
14          concept that the Chm7 C-terminal domain might have an ESCRT-III-like structure  
15          recognized by Heh2.

16

### 17          **Chm7 is required for Heh1/Heh2-Snf7 interactions *in vivo***

18          We next tested interactions between Chm7, other ESCRTs and Heh1/2 *in vivo* using  
19          Bifunctional Complementation (BiFC)(Figure 1G, Figure 1-figure supplement 2)  
20          (Kerppola, 2008). Using this approach, bait and prey proteins are endogenously tagged  
21          with an N terminal (VN) and C-terminal (VC) domain of the fluorescent protein Venus,  
22          respectively. When bait and prey proteins associate, Venus folds and fluoresces.  
23          Consistent with the idea that Chm7 might bind directly to Snf7 (Bauer *et al.*, 2015), we

1 observed specific BiFC between Snf7-VC and Chm7-VN within puncta throughout the  
2 cell but not between Bro1-VC or Vps20-VC and Chm7-VN (Figure 1-figure supplement  
3 2). We also observed low levels of BiFC between Chm7-VN and Vps4-VC likely  
4 mediated by the MIM domain in the Chm7 C-terminus ((Bauer *et al.*, 2015), Figure 1-  
5 figure supplement 2). We were next able to recapitulate the direct binding interaction  
6 between Heh2 and Chm7 *in vivo* through the observation of BiFC signal between Heh2-  
7 VN and Chm7-VC as a solitary fluorescent focus (Figure 1G). Its low abundance (in only  
8 ~3% of cells) contrasted with cells expressing the Heh1-VN Chm7-VC combination  
9 where we observed a focus in ~28% of cells. This potential preference to Heh1 was not  
10 unanticipated, as Heh1 is a paralogue of Heh2 (King *et al.*, 2006) and it shares much of  
11 its primary and secondary structure including the N-terminal LEM domain; it is also  
12 established to have overlapping functional and physical interactions with Heh2 (Yewdell  
13 *et al.*, 2011; Webster *et al.*, 2014). Unfortunately, despite numerous attempts, we were  
14 unable to produce a stable recombinant form of the N-terminus of Heh1 to confirm its  
15 direct binding to Chm7. We nonetheless conclude that both Heh1 and Heh2 interact  
16 with Chm7.

17 Intriguingly, the Heh1/2-Chm7 BiFC fluorescence signal concentrated into one or  
18 two foci that were reminiscent of the NE-localized foci that we observed previously in  
19 BiFC experiments between Heh1/2 and Snf7 ((Webster *et al.*, 2014) and recapitulated  
20 in Figure 2B). We hypothesized that these BiFC foci might represent a functional  
21 organization of the ESCRT and Heh proteins at a discrete domain/region of the NE,  
22 although it is plausible that this pattern simply represents the product of stochastic  
23 molecular collisions stabilized by Venus folding. To differentiate between these

1 possibilities, we first tested whether BiFC could readout dynamic functional ESCRT  
2 interactions at endosomes. For example, the functional interaction between Snf7 and  
3 Vps20 occurs after Vps25 action (Teis *et al.*, 2010). Consistent with these data, we  
4 failed to observe substantial BiFC signal between Vps20-VN and Snf7-VC in the  
5 absence of *VPS25* (Figure 2A,C), despite the fusion proteins being produced at levels  
6 comparable to wildtype cells (Figure 2-figure supplement 1A). This effect was specific,  
7 as Snf7-VN Vps20-VC BiFC was not reduced in *vps24Δ*, *vps2Δ*, *bro1Δ*, *vps24Δ* and  
8 *chm7Δ* strains (Figure 2C). Thus, BiFC is capable of providing a faithful readout of  
9 functional spatiotemporal biochemical interactions of ESCRTs.

10       Knowing that BiFC could provide insight into the functional state of ESCRT-  
11 interactions, we tested whether deletion of different ESCRTs influenced the BiFC signal  
12 between Heh1/2 and Snf7. In contrast to BiFC at endosomes, and consistent with our  
13 prior genetic analysis (Webster *et al.*, 2014), the deletion of the canonical Snf7  
14 activation components (Vps25 and Vps20) did not diminish, but in fact slightly increased  
15 BiFC of Heh1/2-VN Snf7-VC (Figure 2B,D). These data support the concept that there  
16 is a distinct biochemical arm of the ESCRT machinery at the NE; we therefore tested  
17 whether Chm7 might be a key component of this pathway by testing how it influenced  
18 Heh1/2-Snf7 BiFC. Strikingly, the deletion of *CHM7* virtually abolished BiFC between  
19 both Heh1/2-VN and Snf7-VC (Figure 2B,D) suggesting that Chm7 might help stimulate,  
20 stabilize and/or bridge the interaction between these proteins. In direct analogy to the  
21 Vps25-dependence of Vps20-Snf7 endosome interactions, these data also further  
22 reinforce the hypothesis that Chm7 (as a fusion of an ESCRT-II and ESCRT-III domain)  
23 might supplant the function of Vps25-20 at the NE. While the precise interplay between

1 Heh1, Heh2, Chm7 and Snf7 remains to be fully understood within more extensive  
2 future biochemical and structural experiments, we think that it is likely that the  
3 localization of BiFC signal to a NE-focus represents a subdomain at the NE where these  
4 proteins interact to carry out specific NE-functions.

5

## 6 **Chm7 localizes to a focus on the NE**

7 To begin to explore how Chm7 contributes to NE function, we examined its  
8 steady-state distribution by localizing Chm7-GFP expressed from the chromosomal  
9 *CHM7* locus (Figure 3A). Chm7-GFP showed a diffuse cytosolic fluorescence  
10 (consistent with recent work(Bauer *et al.*, 2015)) and, in ~26% of cells (Figure 4-figure  
11 supplement 1C), a discrete focus (sometimes two foci; Figure 4B) that overlapped with  
12 a Nup170-mCherry NE marker (Figure 3A). As the Chm7-GFP NE focus resembled  
13 those observed within the BiFC experiments, we tested whether it enriched at a similar  
14 NE domain. As shown in Figure 3B, this is indeed the case as ~65% of the Heh1-VN  
15 Snf7-VC BiFC fluorescent foci co-localized with the Chm7-mCherry foci. As the  
16 appearance of the Chm7-GFP, and Heh1-Snf7 BiFC foci were highly reminiscent of  
17 SPBs, we tested whether they co-localized with the SPB protein, Mps3 (Figure 3B,  
18 Figure 3-figure supplement 1A,B). In both cases, we observed minimal co-localization,  
19 with only 14% of Chm7-GFP overlapping with Mps3-mCherry at steady state supporting  
20 the conclusion that the biochemical composition of this NE subdomain is distinct from  
21 SPBs.

22

## 23 **Heh1 contributes to the formation of the Chm7-subdomain**

1 We next investigated how deletion of *HEH1* and *HEH2* influences the recruitment of  
2 Chm7-GFP to the NE. Strikingly, in *heh1Δ* cells, there was a complete loss of Chm7-  
3 GFP foci on the NE also seen in *heh1Δheh2Δ* cells (Figure 3C and E). In contrast,  
4 Chm7-GFP foci were more numerous and in a higher percentage of cells lacking *HEH2*  
5 (Figure 3C, E and Figure 4B); neither of these changes in distribution reflected  
6 alterations in Chm7 protein levels (Figure 4-figure supplement 1A). However, consistent  
7 with the idea that both Heh1 and Heh2 can directly bind Chm7, the NE-recruitment of  
8 Chm7 could be restored in *heh1Δ* cells by either overexpressing *HEH1* or *HEH2* (Figure  
9 3D,E). These data clearly suggest a requirement for Heh1 and Heh2 in the recruitment  
10 of Chm7 to the NE, but that other factors or physiological conditions influence the  
11 strength or stability of these interactions. To explore this relationship further, we used  
12 the distribution of Chm7-GFP at the NE as a facile assay to explore the molecular  
13 determinants of Chm7-GFP recruitment in more detail.

14

### 15 **Perturbation to NPC assembly, not nuclear transport, affects Chm7 distribution**

16 As our prior work (Webster *et al.*, 2014) implicated the ESCRT machinery as  
17 contributing to normal NPC biogenesis, we next explored how Chm7-GFP localization  
18 was influenced by deletion of several non-essential nup genes, focusing on components  
19 of the membrane ring (Pom152), the inner ring (Nup170 and Nup157) and the outer ring  
20 (Nup133)(Figure 4-figure supplement 1B)(Alber *et al.*, 2007). Despite the fact that these  
21 nups are components of distinct NPC subcomplexes their perturbation results in a  
22 consistent increase in both the number of Chm7-GFP foci (Figure 4A, B) and the  
23 percentage of cells in which Chm7-GFP is localized to the NE at steady state (Figure 4-

1 figure supplement 1C), but not total Chm7-GFP levels (Figure 4-figure supplement 1A).  
2 The most striking increase was observed in cells lacking *POM152*, which resulted in an  
3 increase from ~26% to ~80% of cells with Chm7-GFP NE foci, ~70% of which had more  
4 than one foci (Figure 4B). These data suggest that either the disruption of NPC function,  
5 or, perturbation in the assembly of NPCs lacking these components contribute to the  
6 recruitment of Chm7-GFP to the NE.

7 To differentiate between the possibilities that Chm7 recruitment to the NE  
8 responded to loss of NPC function or NPC assembly, we tested Chm7-GFP localization  
9 under conditions in which active nuclear transport is inhibited by incubating cells in the  
10 presence of the energy poison, 2-deoxyglucose (Shulga *et al.*, 1996; 2000; Timney *et*  
11 *al.*, 2006). We also treated cells with hexanediol, a common reagent used to perturb the  
12 diffusion barrier of the NPC (Ribbeck and Görlich, 2002; Shulga and Goldfarb, 2003).  
13 As shown in Figure 4C and D, neither of these treatments influenced the proportion of  
14 cells containing Chm7-GFP foci nor their relative numbers, suggesting that gross  
15 perturbation of NPC function does not influence Chm7 distribution.

16 We next examined Chm7-GFP localization upon blocking NPC assembly. For  
17 these experiments, we first assessed Chm7-GFP in *apq12Δ* strains, which are cold  
18 sensitive and show defects in NPC assembly and perturbations in NE morphology  
19 (Scarcelli *et al.*, 2007). Interestingly, even in wildtype cells the number of Chm7-foci was  
20 influenced by temperature changing from ~15% of the population at 23°C to ~50% at  
21 37°C (Figure 4-figure supplement 1C). These differences were exacerbated in *apq12Δ*  
22 cells, such that at lower (23°C) but most clearly at high (37°C) temperatures, there was  
23 a dramatic increase in the percentage of *apq12Δ* cells with foci (up to ~90%)(Figure

1 5A,B, Figure 5–figure supplement 1A). Perhaps most compellingly, ~37% of the *apq12Δ*  
2 cells had four or more foci at 37°C (Figure 5B). As *apq12Δ* cells also have aberrant NE  
3 morphology including NE herniations (Scarcelli *et al.*, 2007), we cannot be certain  
4 whether these alterations in Chm7 distribution reflect defects in NPC assembly or  
5 perturbations to membrane morphology (or both).

6 To begin to distinguish between whether the recruitment of Chm7 responded to  
7 changes in NE morphology and/or defects in NPC assembly, we examined Chm7  
8 distribution within strains expressing the conditional nup alleles, *nic96-1* (Zabel *et al.*,  
9 1996) and *nup192-15* (Kosova *et al.*, 1999). Both of these alleles encode components of  
10 the inner ring complex, which is essential for NPC assembly. Interestingly while at both  
11 the permissive (23°C) and non-permissive temperatures (37°C) there was a significant  
12 increase in the number of cells with Chm7-GFP (Figure 5-figure supplement 1B) and a  
13 larger distribution in the number of foci per cell (Figure 5B), the most significant changes  
14 were observed at the lower temperature where these alleles are only partially  
15 compromised. Together, these data allow us to argue that it is likely that Chm7 is  
16 recruited to the NE when NPC assembly is perturbed, perhaps to defective NPCs or  
17 NPC assembly intermediates.

18

### 19 **Chm7 is recruited to lamellar membranes containing nuclear pores, and the SINC**

20 To more directly assess whether Chm7 might interact with a site of NPC  
21 assembly (or misassembly), we took advantage of the observation that overexpression  
22 of Nup53 leads to formation of intranuclear lamellar membranes with pores devoid of  
23 NPCs but containing at least the transmembrane nups, Pom152 and Ndc1 (Marelli *et*

1 *al.*, 2001). Over 16 hours of Nup53 overproduction, we observed a consistent and  
2 incremental accumulation of Chm7-GFP onto these membranes (Figure 5C, D and  
3 Figure 5–figure supplement 1C, D). These data support that Chm7 is recruited to  
4 expanded regions of the NE known to have pore-like structures that lack fully formed  
5 NPCs. As these membranes were triggered by the extreme overproduction of Nup53,  
6 we also sought more physiological conditions to examine Chm7 distribution that would  
7 nonetheless mimic an environment rich in assembling, but malformed, NPCs.

8       Previously, we identified the SINC as a compartment on the NE containing newly  
9 synthesized nucleoporins, but not fully formed NPCs, which was most prevalent in  
10 *vps4Δ* and *vps4Δpom152Δ* cells (Webster *et al.*, 2014). We therefore asked whether  
11 Chm7 might enrich within the SINC. There was an obvious accumulation of multiple  
12 Chm7-GFP foci throughout both *vps4Δ* and, most substantially, *vps4Δpom152Δ* cells  
13 (Figure 6A). To visualize the SINC, we simultaneously evaluated the distribution of  
14 Nup170-mCherry (Webster *et al.*, 2014). As shown in Figure 6B, we observed a clear  
15 accumulation of Chm7-GFP in the SINC; indeed, virtually all SINC-containing cells  
16 (Figure 6C). This contrasted with the lack of accumulation of Chm7-GFP within  
17 morphologically similar clustered NPCs observed in *nup133Δ* cells (Figure 6C, D). To  
18 quantify the level of Chm7 SINC accumulation, we measured the fluorescence intensity  
19 of Chm7-GFP in the SINC and compared these values to non-SINC Chm7-GFP foci  
20 that were similar to those seen in wildtype cells. Clearly, there was substantially more  
21 Chm7-GFP in SINC-containing cells reaching a 10-fold increase over non-SINC compartments (Figure  
22 6E). Moreover, this SINC accumulation likely occurred over several generations as the  
23 levels of SINC-enriched Chm7-GFP correlated with the accumulation of Nup170-



1 mCherry (Figure 6F). Consistent with this idea, SINC-associated Chm7-GFP is retained  
2 in mother cells during mitosis (Movie 1). Together, these data support that Chm7 can  
3 recognize a domain at the NE rich in assembling nups, but lacking fully formed NPCs.  
4 The enrichment of Chm7 in the SINC also suggests that the accumulation of Chm7 in  
5 the absence of Vps4 and Pom152 might contribute to the underlying molecular  
6 pathology that leads to the SINC's expansion and resulting toxicity.

7

### 8 **Chm7 is required for SINC formation**

9 To test the idea that Chm7 might be required to form the SINC in genetic  
10 backgrounds that promote its formation, we crossed *vps4Δpom152Δ* and *chm7Δ* cells  
11 and analyzed the growth of their progeny. Surprisingly, we observed a suppression of  
12 the impaired fitness of *vps4Δpom152Δ* strains with the *vps4Δpom152Δchm7Δ* strain  
13 showing growth indistinguishable from that of wildtype cells (Figure 7A). These data  
14 suggest that the growth retardation of *vps4Δpom152Δ* strains occurs due to a  
15 deleterious gain of function of Chm7. We considered two possible models to explain  
16 how deletion of Chm7 might rescue the *vps4Δpom152Δ* growth defect. In one, endocytic  
17 sorting defects in *vps4Δ* strains could be rescued by deletion of *CHM7*. As shown in  
18 Figure 7B and C, this did not seem to be the case, as the distribution of the model  
19 endocytic cargo Sna3-mCherry (Reggiori and Pelham, 2001; Russell *et al.*, 2012)  
20 remained in class E-compartments in both *vps4Δ* and *vps4Δchm7Δ* cells, and was not  
21 properly targeted to vacuoles as in WT and *chm7Δ* cells (Figure 7C). Alternatively, in the  
22 second model, Chm7 might directly contribute to SINC formation, which would then be  
23 the underlying cause of toxicity. Strikingly, and consistent with such a model, GFP-

1 Nup49 no longer accumulated in the SINC in *vps4Δchm7Δ* or *vps4Δpom152Δchm7Δ*  
2 cells, despite its clear presence in *CHM7*-containing backgrounds (Figure 7D, Figure 7–  
3 figure supplement 1).

4         The absence of the SINC in *vps4Δchm7Δ* cells also raised the possibility that the  
5 defects in nuclear compartmentalization observed in SINC-containing cells (Webster *et*  
6 *al.*, 2014) would be reversed in the absence of *CHM7*. To assess this possibility, we  
7 calculated the nuclear-cytosolic (N:C) ratio of a nuclear localization signal (NLS)-GFP  
8 reporter within individual cells, which had a mean value of 1.8 in wildtype and *chm7Δ*  
9 knockouts cell populations that was significantly reduced to 1.7 in *vps4Δ* strains (Figure  
10 7E, F). Strikingly, N:C ratios in *vps4Δchm7Δ* were near-identical to wildtype cells (Figure  
11 7E, F). Together, our data are consistent with a model in which the local regulation of  
12 *Chm7* contributes to NPC quality control to promote proper nuclear  
13 compartmentalization.

14

15

## 1 **Discussion**

2 NPC assembly occurs through the step-wise recruitment of nups and nup  
3 subcomplexes to an NPC assembly site concurrent with membrane remodeling events  
4 that lead to the fusion of the INM and ONM. The mechanisms coupling these two  
5 processes, nup recruitment and membrane remodeling, remain to be completely  
6 defined, but likely depend on the concerted action of many redundant factors. Indeed, in  
7 addition to specific nups and soluble nuclear transport receptors (Lusk *et al.*, 2002;  
8 Harel *et al.*, 2003; Ryan *et al.*, 2007; Lau *et al.*, 2009), there is a growing list of proteins  
9 that impact NPC assembly including established membrane-bending proteins with  
10 reticulon-domains (Dawson *et al.*, 2009; Chadrin *et al.*, 2010), factors that influence  
11 membrane fluidity like Apq12 (Scarcelli *et al.*, 2007) and Brr6 (Hodge *et al.*, 2010),  
12 integral INM proteins (Yewdell *et al.*, 2011; Talamas and Hetzer, 2011) and torsin  
13 (VanGompel *et al.*, 2015). Here, we introduce Chm7 as an additional component of the  
14 NPC assembly pathway; however, our data support that its role in nuclear pore  
15 biogenesis is distinct from these other established factors.

16 A critical clue to the function of Chm7 in the NPC assembly pathway is its  
17 specific recruitment to a solitary focus on the NE (Figure 3). With the exception of SPBs,  
18 which co-localize infrequently with Chm7, we are unaware of other proteins with this  
19 unique distribution, suggesting that Chm7 may delimit a previously undiscovered,  
20 biochemically distinct subdomain of the NE. While we do not yet have a complete  
21 accounting of the other factors that comprise this subdomain, the direct binding  
22 experiments (Figure 1), in concert with the genetic and BiFC analysis (Figure 2),  
23 support the conclusion that the integral INM proteins Heh1 and Heh2, the ESCRT-III

1 subunit, Snf7, and Vps4 are key factors that contribute to its establishment and/or  
2 maintenance. Indeed, as the bulk of Heh1/2 are distributed throughout the NE (King *et*  
3 *al.*, 2006; Yewdell *et al.*, 2011), and Snf7 is found throughout the cytosol and at  
4 endosomes (Babst *et al.*, 1998), the localization of Chm7 provides a window into the  
5 function of this unique subset of NE-interactions; we propose that the Chm7 subdomain  
6 represents the major site of ESCRT-III function at the budding yeast NE.

7 Consistent with the concept that the Chm7 focus might demark the location of  
8 ESCRT-III function at the NE, the prevalence of the Chm7 foci dramatically increased  
9 upon inhibiting NPC assembly. Interestingly, however, the most abundant foci in *nic96-1*  
10 and *nup192-15* cells were present at the permissive (i.e. room temperature) instead of  
11 the non-permissive temperature (Figure 5). We interpret these data in a framework in  
12 which there are kinetic delays in assembly imposed by partially compromised alleles  
13 that is sensed and leads to Chm7 recruitment; these delays would be predicted to be  
14 absent at the non-permissive temperature due to a complete loss of function and  
15 assembly. This interpretation is consistent with the increase of foci in the non-essential  
16 nup knockouts strains as well (Figure 4), which allow for functional NPC formation but  
17 might nonetheless lead to a decrease in NPC assembly efficiency or quality.

18 Taken together, we suggest a model in which Chm7 is capable of recognizing a  
19 domain of the NE containing assembling (or misassembling) NPC(s). As very little is  
20 understood morphologically or biochemically about the steps in NPC assembly, it is  
21 difficult to assess at which “step” Chm7 might be recruited to a nascent NPC assembly  
22 site. An informative clue might be Chm7’s enrichment on intranuclear lamellar  
23 membranes induced by the overexpression of Nup53 (Marelli *et al.*, 2001)(Figure 5). As

1 these membranes are rich in NE pores, but not NPCs, a plausible hypothesis would be  
2 that Chm7 recognizes an NPC assembly intermediate post-membrane fusion. Such a  
3 model would also be compatible with the enrichment of Chm7 in the SINC, as the SINC  
4 contains FG-nups of the central transport channel (Webster *et al.*, 2014) that are likely  
5 assembled after fusion (Dawson *et al.*, 2009). Last, the concept that Chm7 might be  
6 recruited to a region of NE containing pores, but not NPCs, is consistent with work in  
7 mammalian cell lines where CHMP7 (and other ESCRT-III subunits) is recruited to seal  
8 NE holes at the end of mitosis by an annular fusion/membrane scission event (Vietri *et*  
9 *al.*, 2015; Olmos *et al.*, 2015), although how such structures are recognized remains  
10 unknown.

11 The scission of closely apposed membranes is the common thread that links  
12 ESCRT-III function in multiple cellular locales including the sealing of NE holes (Hurley,  
13 2015). Such a mechanism, however, is not compatible with a role for ESCRTs in NPC  
14 assembly, as ESCRT-III would be predicted to seal the very pores necessary for their  
15 insertion. Thus, either Chm7 directly contributes to membrane remodeling to perhaps  
16 dilate or stabilize a nascent nuclear pore (Webster and Lusk, 2015), or, it is involved  
17 with a quality control pathway that prevents further aberrant assembly. One possibility  
18 would be the removal of defective NPCs or NPC assembly intermediates that would  
19 ultimately leave holes to be sealed by ESCRT-III. While NPCs are extremely stable in  
20 post-mitotic cells (D'Angelo *et al.*, 2009; Savas *et al.*, 2012; Toyama *et al.*, 2013), there  
21 is some evidence to support that NPCs might be removed from the NE in cell culture  
22 suggesting that this might be a plausible scenario (Dultz and Ellenberg, 2010).  
23 However, as *chm7Δ* cells do not have any obvious defects in nuclear

1 compartmentalization (Figure 7) that would be predicted from the existence of empty NE  
2 holes, we favor an alternative quality control model where defective NPCs might be  
3 sealed off by expanded membrane.

4         The concept that defective NPCs might be sealed by exposed, closely apposed  
5 membranes can be found in decades-old electron micrographs of *nup116Δ* cells, in  
6 which NPCs are covered by a double membrane (Wente and Blobel, 1993). Similar  
7 structures have been observed in *apq12Δ* cells (Scarcelli, *et al.*, 2007) and in those  
8 expressing *gle2* alleles (Murphy *et al.*, 1996) and could exist in the SINC as well  
9 (Webster *et al.*, 2014). As the seal is a double membrane, a hypothetical intermediate  
10 would be an expansion of an untethered nuclear pore membrane (Wente and Blobel,  
11 1993); the sealing of such an expansion would be compatible with an ESCRT-driven  
12 scission step. This model makes the prediction that NPCs in *chm7Δnup116Δ* cells would  
13 fail to be sealed (an active topic of investigation in our lab). Moreover, this could be the  
14 mechanistic basis for the observed gain of function of Chm7 in *VPS4* and *POM152* null  
15 strains, which could lead to prematurely formed membrane seals over nascent NPCs  
16 thereby contributing to SINC formation. Thus, the spatial and/or temporal regulation of  
17 Chm7 by Vps4 and Pom152 at an NPC assembly site will be essential for ensuring it  
18 functions productively to maintain nuclear compartmentalization; our data support that  
19 Chm7 has the unique capability to function in a mechanism that differentiates functional  
20 and non-functional NPCs.

21         To ultimately elucidate the mechanism of Chm7 function in NPC quality control  
22 will require a better understanding of how it recognizes a nascent assembly site. In our  
23 prior study, we implicated Heh2 as a factor capable of differentiating between fully

1 formed and nascent NPCs (Webster *et al.*, 2014). While Heh2 remains a key part of  
2 such a surveillance mechanism, the data presented here point to Heh1 as being the  
3 major factor recruiting Chm7 to the NE and thus acting before Heh2 (Figure 3). The fact  
4 that Chm7 is required for the Heh1/2-Snf7 *in vivo* interactions (Figure 2) is further  
5 suggestive of a stepwise mechanism where Chm7 might help bridge or stimulate  
6 interactions between Heh2 and Snf7, perhaps explaining their sub-stoichiometric  
7 binding *in vitro* (Figure 1). Lastly, a key part of the NPC surveillance mechanism will be  
8 in understanding the mechanism of Snf7 activation. Our data argue against the  
9 attractive model where Chm7 simply supplants Vps20-Vps25 function at the NE, as this  
10 model does not incorporate binding of Heh2 (and likely Heh1) to the 'open' forms of  
11 both Snf7 and Chm7 (Figure 1). Determining how the Heh proteins and Chm7 come  
12 together to activate a potentially unique Snf7 homo or heteropolymer will be an exciting  
13 feature of this emerging mechanism of NPC quality control that awaits future structural  
14 studies.  
15

## 1 **Materials and Methods**

### 2 **Yeast Strain Generation and Growth**

3 All strains used in this study are listed in Supplementary file 1. Gene knockouts and  
4 fluorescent tagging of endogenous genes were performed by PCR-based integration  
5 using the pFA6a plasmid series (see Table 1: Plasmids, Supplementary file 2) as  
6 templates (Longtine *et al.*, 1998; Van Driessche *et al.*, 2005; Sung and Huh, 2007).  
7 Standard yeast protocols for transformation, mating, sporulation and tetrad dissection  
8 were performed as described in (Amberg, D. Burke and Strathern, 2005). Unless  
9 otherwise indicated, cells were grown to mid-log phase in YPAD (1% bacto yeast  
10 extract [BD] 2% bacto peptone [BD] and 2% D-glucose [Sigma] 0.025% adenine  
11 [Sigma]) or in complete synthetic medium (CSM) containing 2% D-glucose and lacking  
12 one or more amino acids at 30°C. For comparing relative growth rates of yeast strains,  
13 equivalent numbers of cells from overnight cultures were spotted in six, 10-fold serial  
14 dilutions onto YPD plates and imaged after 48 h at RT.

15

16 *APQ12* null cells (DTCPL136) were grown overnight at 30°C, divided and diluted into  
17 two cultures at an OD<sub>600</sub> of 0.2. Individual cultures were then grown at 23°C or 37°C for  
18 5 h before imaging. Similarly, strains expressing temperature sensitive NPC assembly  
19 alleles (*nic96-1* and *nup192-15*) were grown at the permissive temperature (23°C) and  
20 shifted to 37°C for 5 h before imaging.

21

22 To drive the overexpression of *NUP53* behind the copper inducible *CUP1* promoter,  
23 Chm7-GFP expressing cells were transformed with either pYEX-BX or pYEX-BX-



1 NUP53. Resulting transformants were grown to mid-log phase in CSM-URA. CuSO<sub>4</sub>  
2 was added to both cultures at a final concentration of 0.5 mM and imaged over 16 h  
3 (Marelli *et al.*, 2001).

4

## 5 **Plasmids**

6 All plasmids are listed in Supplementary file 2. All plasmids generated in this study were  
7 verified by sequencing. To generate pRS426-HEH1 and pRS426-HEH2, the *HEH1* and  
8 *HEH2* genes were PCR amplified from isolated chromosomal DNA with 5' and 3'  
9 regions encompassing the native promoters and terminators. The PCR products were  
10 integrated into pRS426 (Christianson *et al.*, 1992) using homologous recombination in  
11 yeast. Briefly, pRS426 was linearized and co-transformed with the *HEH1* and *HEH2*  
12 PCR products into W303a. Transformants were selected on CSM-URA plates and  
13 grown overnight in CSM-URA before plasmid isolation using a modified protocol in  
14 (Amberg, D. Burke and Strathern, 2005) that incorporates a plasmid purification step on  
15 Qiagen miniprep columns (Qiagen).

16

17 All other plasmids were generated using the Gibson Assembly MasterMix (New England  
18 Biolabs) according to the manufacturer's instructions. Briefly, coding regions of plasmid  
19 inserts were PCR amplified from W303 chromosomal DNA using Q5 DNA polymerase  
20 (New England Biolabs) and assembled into either pCS2 (Promega) linearized with  
21 BamHI/EcoRI (New England Biolabs), pGEX-6P1 (GE Life Sciences) linearized with  
22 BamHI/XhoI or pET28a linearized with XbaI/XhoI.

23

## 1 **Production and Affinity Purification of recombinant proteins**

2 *E. coli* BL21 (DE3) cells expressing GST fusion proteins were grown overnight, diluted  
3 to an OD<sub>600</sub> of 0.15 in 2xYT, and allowed to reach an OD<sub>600</sub> of 0.5 before the addition of  
4 IPTG to a final concentration of 0.5 mM. Cultures were then shifted to 24°C for 6 h  
5 before collecting cells by centrifugation. Cell pellets derived from 50 mL of culture were  
6 flash frozen in liquid nitrogen and stored at -80°C before lysis and protein purification.

7  
8 Frozen pellets were resuspended in 15 mL lysis buffer (50 mM Tris pH 7.4, 300 mM  
9 NaCl, 2 mM MgCl<sub>2</sub>, 2 mM CaCl<sub>2</sub>, 10 % glycerol, 0.5 % NP-40, 1 mM DTT, Roche  
10 complete protease inhibitors) and lysed by sonication (Branson Sonifier 450). Whole cell  
11 lysates were cleared by centrifugation for 15 minutes at 20000 x g. Supernatants were  
12 incubated in batch with 100 µL of glutathione sepharose (GT) beads 4B (GE  
13 Healthcare) for 1 h, collected by centrifugation, and washed three times with lysis buffer  
14 before being used as bait in binding experiments (below) or released from beads (and  
15 GST) through incubation with HRV 3C protease (Thermo Scientific) overnight at 4 °C.

## 16 17 **Recombinant protein binding experiments**

18 GT-beads with bound GST, or GST-fusions of Snf7 or Chm7 were washed with a  
19 binding buffer of PBS containing 10 % glycerol, 0.5 % NP-40 and 0.5 mM DTT. Beads  
20 were then incubated with purified Heh2 generated from HRV 3C cleavage or *in vitro*  
21 transcription and translation (IVT; see below) for 1 h at 4 °C, collected by centrifugation  
22 and washed three times with binding buffer. Bound proteins were eluted with 30 µL of  
23 2x SDS-PAGE sample buffer before separation by SDS-PAGE. Proteins were

1 visualized by staining with SimplyBlue SafeStain (Invitrogen), Western blot or  
2 autoradiography.

3

#### 4 ***In vitro* transcription and translation (IVT) and autoradiography**

5 TNT Quick Coupled Transcription/Translation System (Promega) was used to generate  
6 radiolabeled fragments of Heh2. Specifically, individual 40  $\mu$ L IVT reactions were  
7 performed for 90 minutes at 30°C and consisted of 600 ng of plasmid DNA encoding  
8 Heh2 fragments, 20  $\mu$ Ci [<sup>35</sup>S] Methionine and 10  $\mu$ L of IVT mix. 10  $\mu$ L of the completed  
9 IVT reaction was used within individual binding experiments. SDS-PAGE gels with  
10 radiolabeled proteins were dried at 80°C for 1 h using a gel dryer (EC355, E-C  
11 Apparatus Corporation) and exposed to autoradiography film (Bio-Rad Molecular  
12 Imager FX Imaging Screen) for three days. [<sup>35</sup>S] Methionine-labeled proteins were  
13 visualized using a Bio-Rad Personal Molecular Imager (Bio-Rad).

14

#### 15 **Western blotting**

16 Proteins separated by SDS-PAGE were transferred to nitrocellulose for Western blotting  
17 with the following primary antibodies: anti-GFP (gift of M. Rout), anti-Snf7 (gift of D.  
18 Katzmann). Primary antibodies were detected with anti-rabbit HRP conjugated  
19 secondary antibodies followed by ECL. ECL visualized using a VersaDoc Imaging  
20 System (Bio-Rad).

21

#### 22 **Fluorescence microscopy**

1 All fluorescence images were acquired on a DeltaVision widefield deconvolution  
2 microscope (Applied Precision/GE Healthcare) equipped with a 100x, 1.40 numerical  
3 aperture objective (Olympus), solid state illumination and an Evolve EMCCD camera  
4 (Photometrics). In all cases, Z-stacks of images (0.2  $\mu\text{m}$  sections) were acquired.  
5 For timelapse experiments, cells were first immobilized on a 1.4% agarose pad  
6 containing CSM, 2% D-glucose, 0.025% adenine, and sealed with VALAP (1:1:1,  
7 vaseline:lanolin:paraffin) before imaging.

8

### 9 **Image processing and analysis**

10 All fluorescent micrographs presented were deconvolved using the iterative algorithm in  
11 softWoRx (version 6.5.1; Applied Precision GE Healthcare) with subsequent processing  
12 and analyses performed in Fiji/ImageJ (Schindelin *et al.*, 2015). Importantly,  
13 quantification of fluorescence intensities was performed on unprocessed images after  
14 background subtraction.

15

16 To quantify the fluorescence intensity of Venus within BiFC experiments, the integrated  
17 density of Venus fluorescence within a central focal plane of an entire cell was  
18 measured. Similarly, the total fluorescence intensity of Chm7-GFP associated (or not)  
19 with SINC was measured using Nup170-mCherry as a SINC landmark. To correlate  
20 the enrichment of Chm7-GFP and Nup170-mCherry in the SINC, the integrated density  
21 of Nup170-mCherry and Chm7-GFP fluorescence was measured and plotted on a  
22 correlation curve. The linear correlation coefficient (Pearson coefficient,  $r$ ) was  
23 calculated using Prism (GraphPad).

1

2 To calculate the nuclear to cytosolic ratio of the NLS-GFP reporter, the integrated  
3 density of two identically sized regions of interest (one cytoplasmic, one nuclear) within  
4 a middle z-section of individual cells was measured and related.

5

#### 6 **Deoxyglucose and hexanediol treatment**

7 To disrupt the diffusion barrier of the NPC, cells were collected by centrifugation and  
8 resuspended in CSM containing 2% 1,6 hexanediol for 10 min. at RT before imaging  
9 (Shulga and Goldfarb, 2003). Similarly, to inhibit active nuclear transport, cells were  
10 collected by centrifugation and resuspended in CSM lacking glucose but supplemented  
11 with 10 mM 2-deoxy-D-glucose and incubated for 45 min. at 30°C before  
12 imaging(Shulga *et al.*, 1996).

13

#### 14 **Protein alignment and structural modeling**

15 The alignment of Chm7 and Vps25 in Figure 1 – figure supplement 1B was generated  
16 by Phyre2 (Kelley *et al.*, 2015). Phyre2 predicted and aligned the secondary (2°)  
17 structure of Chm7 to the 2° structure of Vps25 based on the crystal structure, PDB:  
18 1xb4 (Wernimont and Weissenhorn, 2004) with a confidence of 96.6%. The tertiary (3°)  
19 structure of Vps25, which consists of two winged-helix domains (Teo *et al.*, 2004), were  
20 manually mapped onto the Vps25 sequence.

21

22 The alignment of Chm7, Snf7, and Vps20 was generated by T-Coffee Expresso  
23 alignment tools (Notredame *et al.*, 2000) in Figure 1 – figure supplement 1C. The

1 illustration of the Chm7 2° structure is based on predictions generated by Phyre2  
2 (Kelley *et al.*, 2015). Alpha helices 1-4 of the Snf7 2° structure correspond to the Snf7  
3 “core” domain from the crystal structure, PDB: 5FD7a (Tang *et al.*, 2015). Phyre2  
4 structural predictions of Chm7 showed high similarities between the Snf7 “core” domain  
5 and the corresponding Chm7 domains, which aligned with a confidence score of 97.9%.  
6 The remaining Snf7 2° structure/domain organization (alpha helix 0, 5-6, linker, and  
7 MIM domain) is based on predictions from (Tang *et al.*, 2015) and (Henne *et al.*, 2012).  
8 The outlined MIM domains of Chm7 and Vps20 are from (Bauer *et al.*, 2015) and  
9 (Shestakova *et al.*, 2010), respectively.

10

## 11 **Plots and statistical analysis**

12 All graphs and statistical analyses were generated and performed using Prism  
13 (GraphPad 6). P-values for all graphs are represented as follows: ns,  $P > 0.05$ ; \*  $P \leq$   
14  $0.05$ ; \*\*,  $P \leq 0.01$ ; \*\*\*,  $P \leq 0.001$ ; \*\*\*\*,  $P \leq 0.0001$ . All error bars represent standard  
15 deviation from the mean. For graphs in Figure 1 – supplement figure 2B, Figure 2C,  
16 Figure 6D, and Figure 7E, each circle represents one data point and means are marked  
17 by horizontal bars. Un-paired student’s T-tests were used to determine statistical  
18 significance for graphs in Figure 2C and D, Figure 3E, Figure 4D, Figure 4 –  
19 supplement figure 1C, Figure 5 – supplement figure 1A, B, and D, Figure 6D, Figure 7F,  
20 and Figure 7 – supplement figure 1. Two-way ANOVA tests using repeated measures  
21 by both factors were used to determine statistical significance for graphs in Figure 4B,  
22 Figure 5B and D.

23

1 **Acknowledgments**

2 We are grateful for discussions of unpublished data with Adam Frost and Jeremy  
3 Carlton; we thank Megan King and members of the Lusk lab for critical reading of the  
4 manuscript. We appreciate the generosity of Topher Carroll, Mike Rout, Rick Wozniak  
5 and David Katzmann in sharing reagents and expertise. This work was supported by  
6 grants from the NIH GM105672 to C. Patrick Lusk. Brant Webster and David Thaller are  
7 also supported by NIH 5T32GM007223. Jens Jaeger is supported by the German  
8 Research Foundation (Deutsche Forschungsgemeinschaft, DFG).

9

10

11

## 1 **References**

- 2 Adell, M.A.Y., Vogel, G.F., Pakdel, M., Müller, M., Lindner, H., Hess, M.W., Teis, D.  
3 'Coordinated binding of Vps4 to ESCRT-III drives membrane neck constriction during  
4 MVB vesicle formation.' (2014) *Journal of cell biology*, 205(1), pp. 33–49. doi:  
5 10.1083/jcb.201310114.
- 6 Alber, F., Dokudovskaya, S., Veenhoff, L. M., Zhang, W., Kipper, J., Devos, D.,  
7 Suprpto, A., Karni-Schmidt, O., Williams, R., Chait, B. T., Sali, A. and Rout, M. P.  
8 (2007) 'The molecular architecture of the nuclear pore complex', *Nature*, 450(7170), pp.  
9 695–701. doi: 10.1038/nature06405.
- 10 Amberg, D. C., Burke, D. and Strathern, J. N. (2005) *Methods in Yeast Genetics*. CSHL  
11 Press.
- 12 Appen, A., Kosinski, J., Sparks, L., Ori, A., DiGuilio, A. L., Vollmer, B., Mackmull, M.-T.,  
13 Banterle, N., Parca, L., Kastritis, P., Buczak, K., Mosalaganti, S., Hagen, W., Andrés-  
14 Pons, A., Lemke, E. A., Bork, P., Antonin, W., Glavy, J. S., Bui, K. H. and Beck, M.  
15 (2015) 'In situ structural analysis of the human nuclear pore complex.', *Nature*.  
16 526(7571), pp. 140–143. doi: 10.1038/nature15381.
- 17 Babst, M., Wendland, B., Estepa EJ., Emr SD., 'The Vps4p AAA ATPase regulates  
18 membrane association of a Vps protein complex required for normal endosome  
19 function.' (1998) *EMBO J.* 17(11), pp. 2982–2993. doi: 10.1093/emboj/17.11.2982.
- 20 Bajorek, M., Schubert, H. L., McCullough, J., Langelier, C., Eckert, D. M., Stubblefield,  
21 W.-M. B., Uter, N. T., Myszka, D. G., Hill, C. P. and Sundquist, W. I. (2009) 'Structural  
22 basis for ESCRT-III protein autoinhibition.' *Nature structural & molecular biology*. 16(7),  
23 pp. 754–762. doi: 10.1038/nsmb.1621.
- 24 Bauer, I., Brune, T., Preiss, R. and Kölling, R. (2015) 'Evidence for a Nonendosomal  
25 Function of the *Saccharomyces cerevisiae* ESCRT-III-Like Protein Chm7.', *Genetics*.  
26 201(4), pp. 1439–1452. doi: 10.1534/genetics.115.178939.
- 27 Bui, K. H., Appen, von, A., DiGuilio, A. L., Ori, A., Sparks, L., Mackmull, M.-T., Bock, T.,  
28 Hagen, W., Andrés-Pons, A., Glavy, J. S. and Beck, M. (2013) 'Integrated structural  
29 analysis of the human nuclear pore complex scaffold.', *Cell*, 155(6), pp. 1233–1243. doi:  
30 10.1016/j.cell.2013.10.055.
- 31 Burke, B. and Stewart, C. L. (2014) 'Functional architecture of the cell's nucleus in  
32 development, aging, and disease.', *Current topics in developmental biology*. 109 pp. 1–  
33 52. doi: 10.1016/B978-0-12-397920-9.00006-8.
- 34 Casey, A. K., Chen, S., Novick, P., Ferro-Novick, S. and Wente, S. R. (2015) 'Nuclear  
35 pore complex integrity requires Lnp1, a regulator of cortical endoplasmic reticulum.',  
36 *Molecular biology of the cell*. 26(15), pp. 2833–2844. doi: 10.1091/mbc.E15-01-0053.
- 37 Cashikar, A. G., Shim, S., Roth, R., Maldazys, M. R., Heuser, J. E. and Hanson, P. I.



- 1 (2014) 'Structure of cellular ESCRT-III spirals and their relationship to HIV budding.',  
2 *eLife*, 3. doi: 10.7554/eLife.02184.
- 3 Chadrin, A., Hess, B., San Roman, M., Gatti, X., Lombard, B., Loew, D., Barral, YI.,  
4 Palancade, B., Doye, V. 'Pom33, a novel transmembrane nucleoporin required for  
5 proper nuclear pore complex distribution.' (2010) *Journal of cell biology* 189(5), pp.  
6 795–811. doi: 10.1083/jcb.200910043.
- 7 Chiaruttini, N., Redondo-Morata, L., Colom, A., Humbert, F., Lenz, M., Scheuring, S.  
8 and Roux, A. (2015) 'Relaxation of Loaded ESCRT-III Spiral Springs Drives Membrane  
9 Deformation.', *Cell*, 163(4), pp. 866–879. doi: 10.1016/j.cell.2015.10.017.
- 10 Christianson, T. W., Sikorski, R. S., Dante, M., Shero, J. H. and Hieter, P. (1992)  
11 'Multifunctional yeast high-copy-number shuttle vectors.', *Gene*, 110(1), pp. 119–122.
- 12 Colombi, P., Webster, B. M., Fröhlich, F. and Lusk, C. P. (2013) 'The transmission of  
13 nuclear pore complexes to daughter cells requires a cytoplasmic pool of Nsp1.', *The  
14 Journal of cell biology*. 203(2), pp. 215–232. doi: 10.1083/jcb.201305115.
- 15 D'Angelo, M. A., Anderson, D. J., Richard, E. and Hetzer, M. W. (2006) 'Nuclear pores  
16 form de novo from both sides of the nuclear envelope.', *Science* 312(5772), pp. 440–  
17 443. doi: 10.1126/science.1124196.
- 18 D'Angelo, M. A., Raices, M., Panowski, S. H. and Hetzer, M. W. (2009) 'Age-dependent  
19 deterioration of nuclear pore complexes causes a loss of nuclear integrity in postmitotic  
20 cells.', *Cell*, 136(2), pp. 284–295. doi: 10.1016/j.cell.2008.11.037.
- 21 Dawson, R.T., Lazarus, M.D., Hetzer, M.W., Wentz, S.R. 'ER membrane-bending  
22 proteins are necessary for de novo nuclear pore formation.' (2009). *Journal of cell  
23 biology*. 184(5), pp. 659–675. doi: 10.1083/jcb.200806174.
- 24 Dou, Z., Xu, C., Donahue, G., Shimi, T., Pan, J.-A., Zhu, J., Ivanov, A., Capell, B. C.,  
25 Drake, A. M., Shah, P. P., Catanzaro, J. M., Daniel Ricketts, M., Lamark, T., Adam, S.  
26 A., Marmorstein, R., Zong, W.-X., Johansen, T., Goldman, R. D., Adams, P. D. and  
27 Berger, S. L. (2015) 'Autophagy mediates degradation of nuclear lamina.', *Nature*,  
28 527(7576), pp. 105–109. doi: 10.1038/nature15548.
- 29 Doucet, C. M., Talamas, J. A. and Hetzer, M. W. (2010) 'Cell cycle-dependent  
30 differences in nuclear pore complex assembly in metazoa.', *Cell*, 141(6), pp. 1030–  
31 1041. doi: 10.1016/j.cell.2010.04.036.
- 32 Drin, G., Casella, J.F., Gautier, R., Boehmer, T., Schwartz, T.U., Antonny, B. 'A general  
33 amphipathic alpha-helical motif for sensing membrane curvature.' (2007) *Nature  
34 Structural and molecular biology* 14(2), pp. 138–146. doi: 10.1038/nsmb1194.
- 35 Dultz, E. and Ellenberg, J. (2010) 'Live imaging of single nuclear pores reveals unique  
36 assembly kinetics and mechanism in interphase.', *The Journal of cell biology*. 191(1),  
37 pp. 15–22. doi: 10.1083/jcb.201007076.

- 1 Floch, A. G., Tareste, D., Fuchs, P. F. J., Chadrin, A., Naciri, I., Léger, T., Schlenstedt,  
2 G., Palancade, B. and Doye, V. (2015) 'Nuclear pore targeting of the yeast Pom33  
3 nucleoporin depends on karyopherin and lipid binding.', *Journal of cell science*. 128(2),  
4 pp. 305–316. doi: 10.1242/jcs.158915.
- 5 Franz, C., Walczak, R., Yavuz, S., Santarella, R., Gentzel, M., Askjaer, P., Galy, V.,  
6 Hetzer, M., Mattaj, I. W. and Antonin, W. (2007) 'MEL-28/ELYS is required for the  
7 recruitment of nucleoporins to chromatin and postmitotic nuclear pore complex  
8 assembly.', *EMBO reports*. 8(2), pp. 165–172. doi: 10.1038/sj.embor.7400889.
- 9 Frost, A., Elgort M.G., Brandman, O., Clinton, I., Collins, SR., Miller-Vedam, L.,  
10 Weibezahn, J., Hein, MY, Poser, I., Mann, M., Hyman, A.A., Weissman, J.S. 'Functional  
11 repurposing revealed by comparing *S. pombe* and *S. cerevisiae* genetic interactions.'  
12 (2012) *Cell* 149(6), pp. 1339–1352. doi: 10.1016/j.cell.2012.04.028.
- 13 Ghazi-Tabatabai, S., Saksena, S., Short, J. M., Pobbati, A. V., Veprintsev, D. B.,  
14 Crowther, R. A., Emr, S. D., Egelman, E. H. and Williams, R. L. (2008) 'Structure and  
15 disassembly of filaments formed by the ESCRT-III subunit Vps24.', *Structure*, 16(9), pp.  
16 1345–1356. doi: 10.1016/j.str.2008.06.010.
- 17 Goodchild, R. E., Kim, C. E. and Dauer, W. T. (2005) 'Loss of the dystonia-associated  
18 protein torsinA selectively disrupts the neuronal nuclear envelope.', *Neuron*, 48(6), pp.  
19 923–932. doi: 10.1016/j.neuron.2005.11.010.
- 20 Hanson, PI., Roth, R., Lin, Y., Heuser, JE. 'Plasma membrane deformation by circular  
21 arrays of ESCRT-III protein filaments.' (2008) *Journal of cell biology* 180(2), pp. 389–  
22 402. doi: 10.1083/jcb.200707031.
- 23 Harel, A., Chan, R. C., Lachish-Zalait, A., Zimmerman, E., Elbaum, M. and Forbes, D. J.  
24 (2003) 'Importin beta negatively regulates nuclear membrane fusion and nuclear pore  
25 complex assembly.' *Molecular biology of the cell*. 14(11), pp. 4387–4396. doi:  
26 10.1091/mbc.E03-05-0275.
- 27 Hatch, E. and Hetzer, M. (2014) 'Breaching the nuclear envelope in development and  
28 disease.', *The Journal of cell biology*. 205(2), pp. 133–141. doi: 10.1083/jcb.201402003.
- 29 Henne, W. M., Buchkovich, N. J., Zhao, Y. and Emr, S. D. (2012) 'The endosomal  
30 sorting complex ESCRT-II mediates the assembly and architecture of ESCRT-III  
31 helices.', *Cell*, 151(2), pp. 356–371. doi: 10.1016/j.cell.2012.08.039.
- 32 Hodge, C. A., Choudhary, V., Wolyniak, M. J., Scarcelli, J. J., Schneiter, R. and Cole, C.  
33 N. (2010) 'Integral membrane proteins Brr6 and Apq12 link assembly of the nuclear  
34 pore complex to lipid homeostasis in the endoplasmic reticulum.' *Journal of cell science*.  
35 123(Pt 1), pp. 141–151. doi: 10.1242/jcs.055046.
- 36 Horii, M., Shibata, H., Kobayashi, R., Katoh, K., Yorikawa, C., Yasuda, J. and Maki, M.  
37 (2006) 'CHMP7, a novel ESCRT-III-related protein, associates with CHMP4b and  
38 functions in the endosomal sorting pathway.' *The Biochemical journal*. 400(1), pp. 23–

- 1 32. doi: 10.1042/BJ20060897.
- 2 Hurley, J. H. (2015) 'ESCRTs are everywhere.', *The EMBO journal*. 34(19), pp. 2398–  
3 2407. doi: 10.15252/embj.201592484.
- 4 Im, Y. J., Wollert, T., Boura, E. and Hurley, J. H. (2009) 'Structure and function of the  
5 ESCRT-II-III interface in multivesicular body biogenesis.', *Developmental cell*, 17(2), pp.  
6 234–243. doi: 10.1016/j.devcel.2009.07.008.
- 7 Jokhi, V., Ashley, J., Nunnari, J., Noma, A., Ito, N., Wakabayashi-Ito, N., Moore, M. J.  
8 and Budnik, V. (2013) 'Torsin mediates primary envelopment of large ribonucleoprotein  
9 granules at the nuclear envelope.' *Cell reports*, 3(4), pp. 988–995. doi:  
10 10.1016/j.celrep.2013.03.015.
- 11 Kelley, L. A., Mezulis, S., Yates, C. M., Wass, M. N. and Sternberg, M. J. E. (2015) 'The  
12 Phyre2 web portal for protein modeling, prediction and analysis.', *Nature protocols*.  
13 10(6), pp. 845–858. doi: 10.1038/nprot.2015.053.
- 14 Kerppola, T. K. (2008) 'Bimolecular fluorescence complementation (BiFC) analysis as a  
15 probe of protein interactions in living cells.', *Annual review of biophysics*. 37(1), pp.  
16 465–487. doi: 10.1146/annurev.biophys.37.032807.125842.
- 17 Kieffer, C., Skalicky, J. J., Morita, E., De Domenico, I., Ward, D. M., Kaplan, J. and  
18 Sundquist, W. I. (2008) 'Two distinct modes of ESCRT-III recognition are required for  
19 VPS4 functions in lysosomal protein targeting and HIV-1 budding.' *Developmental cell*,  
20 15(1), pp. 62–73. doi: 10.1016/j.devcel.2008.05.014.
- 21 King, M. C. and Lusk, C. P. (2016) 'A model for coordinating nuclear mechanics and  
22 membrane remodeling to support nuclear integrity.', *Current opinion in cell biology*, 41,  
23 pp. 9–17. doi: 10.1016/j.ceb.2016.03.009.
- 24 King, M. C., Lusk, C. P. and Blobel, G. (2006) 'Karyopherin-mediated import of integral  
25 inner nuclear membrane proteins.', *Nature*. 442(7106), pp. 1003–1007. doi:  
26 10.1038/nature05075.
- 27 Kosova, B., Pante, N., Rollenhagen, C. and Hurt, E. (1999) 'Nup192p is a conserved  
28 nucleoporin with a preferential location at the inner site of the nuclear membrane.',  
29 *Journal of Biological Chemistry*, 274(32), pp. 22646–22651.
- 30 Lata, S., Roessle, M., Solomons, J., Jamin, M., Göttlinger, H. G., Svergun, D. I. and  
31 Weissenhorn, W. (2008) 'Structural basis for autoinhibition of ESCRT-III CHMP3.',  
32 *Journal of molecular biology*, 378(4), pp. 818–827. doi: 10.1016/j.jmb.2008.03.030.
- 33 Lata, S., Schoehn, G., Jain, A., Pires, R., Piehler, J., Göttlinger, H. G. and Weissenhorn,  
34 W. (2008) 'Helical structures of ESCRT-III are disassembled by VPS4.', *Science*  
35 321(5894), pp. 1354–1357. doi: 10.1126/science.1161070.
- 36 Lau, C. K., Delmar, V. A., Chan, R. C., Phung, Q., Bernis, C., Fichtman, B., Rasala, B.

- 1 A. and Forbes, D. J. (2009) 'Transportin regulates major mitotic assembly events: from  
2 spindle to nuclear pore assembly.', *Molecular biology of the cell*. 20(18), pp. 4043–4058.  
3 doi: 10.1091/mbc.E09-02-0152.
- 4 Lone, M. A., Atkinson, A. E., Hodge, C. A., Cottier, S., Martínez-Montañés, F., Maithel,  
5 S., Mène-Saffrané, L., Cole, C. N. and Schneiter, R. (2015) 'Yeast Integral Membrane  
6 Proteins Apq12, Brl1, and Brr6 Form a Complex Important for Regulation of Membrane  
7 Homeostasis and Nuclear Pore Complex Biogenesis.', *Eukaryotic cell*. American  
8 Society for Microbiology, 14(12), pp. 1217–1227. doi: 10.1128/EC.00101-15.
- 9 Longtine, M. S., McKenzie, A., Demarini, D. J., Shah, N. G., Wach, A., Brachat, A.,  
10 Philippsen, P. and Pringle, J. R. (1998) 'Additional modules for versatile and economical  
11 PCR-based gene deletion and modification in *Saccharomyces cerevisiae*.' *Yeast*  
12 14(10), pp. 953–961. doi: 10.1002/(SICI)1097-0061(199807)14:10<953::AID-  
13 YEA293>3.0.CO;2-U.
- 14 Lord, C. L., Timney, B. L., Rout, M. P. and Wenthe, S. R. (2015) 'Altering nuclear pore  
15 complex function impacts longevity and mitochondrial function in *S. cerevisiae*.' *The*  
16 *Journal of cell biology*. 208(6), pp. 729–744. doi: 10.1083/jcb.201412024.
- 17 Lusk, C. P., Makhnevych, T., Marelli, M., Aitchison, J. D. and Wozniak, R. W. (2002)  
18 'Karyopherins in nuclear pore biogenesis: a role for Kap121p in the assembly of Nup53p  
19 into nuclear pore complexes.' *The Journal of cell biology*. Rockefeller Univ Press,  
20 159(2), pp. 267–278. doi: 10.1083/jcb.200203079.
- 21 Makio, T., Lapetina, D. L. and Wozniak, R. W. (2013) 'Inheritance of yeast nuclear pore  
22 complexes requires the Nsp1p subcomplex.' *The Journal of cell biology*. 203(2), pp.  
23 187–196. doi: 10.1083/jcb.201304047.
- 24 Marelli, M., Lusk, C. P., Chan, H., Aitchison, J. D. and Wozniak, R. W. (2001) 'A link  
25 between the synthesis of nucleoporins and the biogenesis of the nuclear envelope.'  
26 *The Journal of cell biology*, 153(4), pp. 709–724.
- 27 McCullough, J., Clippinger, A. K., Talledge, N., Skowrya, M. L., Saunders, M. G.,  
28 Naismith, T. V., Colf, L. A., Afonine, P., Arthur, C., Sundquist, W. I., Hanson, P. I. and  
29 Frost, A. (2015) 'Structure and membrane remodeling activity of ESCRT-III helical  
30 polymers.' *Science*. doi: 10.1126/science.aad8305.
- 31 McCullough, J., Colf, L. A. and Sundquist, W. I. (2013) 'Membrane fission reactions of  
32 the mammalian ESCRT pathway.' *Annual review of biochemistry*. 82(1), pp. 663–692.  
33 doi: 10.1146/annurev-biochem-072909-101058.
- 34 McCullough, J., Fisher, R. D., Whitby, F. G., Sundquist, W. I. and Hill, C. P. (2008)  
35 'ALIX-CHMP4 interactions in the human ESCRT pathway.' *Proceedings of the National*  
36 *Academy of Sciences of the United States of America*. 105(22), pp. 7687–7691. doi:  
37 10.1073/pnas.0801567105.
- 38 Mészáros, N., Cibulka, J., Mendiburo, M. J., Romanauska, A., Schneider, M. and

- 1 Köhler, A. (2015) 'Nuclear pore basket proteins are tethered to the nuclear envelope  
2 and can regulate membrane curvature.', *Developmental cell*, 33(3), pp. 285–298. doi:  
3 10.1016/j.devcel.2015.02.017.
- 4 Mochida, K., Oikawa, Y., Kimura, Y., Kirisako, H., Hirano, H., Ohsumi, Y. and  
5 Nakatogawa, H. (2015) 'Receptor-mediated selective autophagy degrades the  
6 endoplasmic reticulum and the nucleus.', *Nature*. 522(7556), pp. 359–362. doi:  
7 10.1038/nature14506.
- 8 Murphy, R., Watkins, J., Wentz, S.R. 'GLE2, a *Saccharomyces cerevisiae* homologue of  
9 the *Schizosaccharomyces pombe* export factor RAE1, is required for nuclear pore  
10 complex structure and function.' (1996) *Molecular Biology of the Cell*. 7(12), pp. 1921–  
11 1937. doi: 10.1091/mbc.7.12.1921.
- 12 Muzioł, T., Pineda-Molina, E., Ravelli, R. B., Zamborlini, A., Usami, Y., Göttlinger, H.  
13 and Weissenhorn, W. (2006) 'Structural basis for budding by the ESCRT-III factor  
14 CHMP3.', *Developmental cell*, 10(6), pp. 821–830. doi: 10.1016/j.devcel.2006.03.013.
- 15 Notredame, C., Higgins, D. G. and Heringa, J. (2000) 'T-Coffee: A novel method for fast  
16 and accurate multiple sequence alignment.', *Journal of molecular biology*, 302(1), pp.  
17 205–217. doi: 10.1006/jmbi.2000.4042.
- 18 Olmos, Y., Hodgson, L., Mantell, J., Verkade, P. and Carlton, J. G. (2015) 'ESCRT-III  
19 controls nuclear envelope reformation.', *Nature*. doi: 10.1038/nature14503.
- 20 Rasala, B. A., Ramos, C., Harel, A. and Forbes, D. J. (2008) 'Capture of AT-rich  
21 chromatin by ELYS recruits POM121 and NDC1 to initiate nuclear pore assembly.',  
22 *Molecular biology of the cell*. 19(9), pp. 3982–3996. doi: 10.1091/mbc.E08-01-0012.
- 23 Reggiori, F. and Pelham, H. R. (2001) 'Sorting of proteins into multivesicular bodies:  
24 ubiquitin-dependent and -independent targeting.', *The EMBO journal*. 20(18), pp. 5176–  
25 5186. doi: 10.1093/emboj/20.18.5176.
- 26 Ribbeck, K. and Görlich, D. (2002) 'The permeability barrier of nuclear pore complexes  
27 appears to operate via hydrophobic exclusion.', *The EMBO journal*. 21(11), pp. 2664–  
28 2671. doi: 10.1093/emboj/21.11.2664.
- 29 Roberts, P., Moshitch-Moshkovitz, S., Kvam, E., O'Toole, E., Winey, M. and Goldfarb,  
30 D. S. (2003) 'Piecemeal microautophagy of nucleus in *Saccharomyces cerevisiae*.',  
31 *Molecular biology of the cell*. 14(1), pp. 129–141. doi: 10.1091/mbc.E02-08-0483.
- 32 Rose, A. and Schlieker, C. (2012) 'Alternative nuclear transport for cellular protein  
33 quality control.', *Trends in cell biology*. 22(10), pp. 509–514. doi:  
34 10.1016/j.tcb.2012.07.003.
- 35 Rotem, A., Gruber, R., Shorer, H., Shaulov, L., Klein, E. and Harel, A. (2009) 'Importin  
36 beta regulates the seeding of chromatin with initiation sites for nuclear pore assembly.',  
37 *Molecular biology of the cell*. 20(18), pp. 4031–4042. doi: 10.1091/mbc.E09-02-0150.

- 1 Rothballer, A. and Kutay, U. (2013) 'Poring over pores: nuclear pore complex insertion  
2 into the nuclear envelope.', *Trends in biochemical sciences*, 38(6), pp. 292–301. doi:  
3 10.1016/j.tibs.2013.04.001.
- 4 Russell, M. R. G., Shideler, T., Nickerson, D. P., West, M. and Odorizzi, G. (2012)  
5 'Class E compartments form in response to ESCRT dysfunction in yeast due to  
6 hyperactivity of the Vps21 Rab GTPase.', *Journal of cell science*. 125(Pt 21), pp. 5208–  
7 5220. doi: 10.1242/jcs.111310.
- 8 Ryan, K. J., McCaffery, J. M. and Wentz, S. R. (2003) 'The Ran GTPase cycle is  
9 required for yeast nuclear pore complex assembly.', *The Journal of cell biology*. 160(7),  
10 pp. 1041–1053. doi: 10.1083/jcb.200209116.
- 11 Ryan, K. J., Zhou, Y. and Wentz, S. R. (2007) 'The karyopherin Kap95 regulates  
12 nuclear pore complex assembly into intact nuclear envelopes in vivo.', *Molecular biology  
13 of the cell*. 18(3), pp. 886–898. doi: 10.1091/mbc.E06-06-0525.
- 14 Saksena, S., Wahlman, J., Teis, D., Johnson, A.E., Emr, S.D. 'Functional reconstitution  
15 of ESCRT-III assembly and disassembly.' (2009) *Cell* 136(1), pp. 97–109. doi:  
16 10.1016/j.cell.2008.11.013.
- 17 Savas, J. N., Toyama, B. H., Xu, T., Yates, J. R. and Hetzer, M. W. (2012) 'Extremely  
18 long-lived nuclear pore proteins in the rat brain.', *Science* 335(6071), pp. 942–942. doi:  
19 10.1126/science.1217421.
- 20 Scarcelli, J. J., Hodge, C. A. and Cole, C. N. (2007) 'The yeast integral membrane  
21 protein Apq12 potentially links membrane dynamics to assembly of nuclear pore  
22 complexes.', *The Journal of cell biology*. Rockefeller Univ Press, 178(5), pp. 799–812.  
23 doi: 10.1083/jcb.200702120.
- 24 Schindelin, J., Rueden, C. T., Hiner, M. C. and Eliceiri, K. W. (2015) 'The ImageJ  
25 ecosystem: An open platform for biomedical image analysis.', *Molecular reproduction  
26 and development*, 82(7-8), pp. 518–529. doi: 10.1002/mrd.22489.
- 27 Schneiter, R., Hitomi, M., Ivessa, A.S., Fasch, E., Kohlwein, S.D., Tartakoff, A. 'A yeast  
28 acetyl coenzyme A carboxylase mutant links very-long-chain fatty acid synthesis to the  
29 structure and function of the nuclear membrane-pore complex.' (1996) *Molecular  
30 Biology of the Cell*. 16(12), pp. 7161–7172.
- 31 Shen, Q.-T., Schuh, A. L., Zheng, Y., Quinney, K., Wang, L., Hanna, M., Mitchell, J. C.,  
32 Otegui, M. S., Ahlquist, P., Cui, Q. and Audhya, A. (2014) 'Structural analysis and  
33 modeling reveals new mechanisms governing ESCRT-III spiral filament assembly.', *The  
34 Journal of cell biology*. 206(6), pp. 763–777. doi: 10.1083/jcb.201403108.
- 35 Shestakova, A., Hanono, A., Drosner, S., Curtiss, M., Davies, B.A., Katzmann, D.J.,  
36 Babst, M. 'Assembly of the AAA ATPase Vps4 on ESCRT-III.' (2010). *Molecular biology  
37 of the Cell* 21(6), pp. 1059–1071. doi: 10.1091/mbc.E09-07-0572.

- 1 Shim, S., Kimpler, L. A. and Hanson, P. I. (2007) 'Structure/function analysis of four  
2 core ESCRT-III proteins reveals common regulatory role for extreme C-terminal  
3 domain.', *Traffic* 8(8), pp. 1068–1079. doi: 10.1111/j.1600-0854.2007.00584.x.
- 4 Shulga, N. and Goldfarb, D. S. (2003) 'Binding dynamics of structural nucleoporins  
5 govern nuclear pore complex permeability and may mediate channel gating.', *Molecular  
6 and cellular biology*. 23(2), pp. 534–542. doi: 10.1128/MCB.23.2.534-542.2003.
- 7 Shulga, N., Mosammamarast, N., Wozniak, R. and Goldfarb, D. S. (2000) 'Yeast  
8 nucleoporins involved in passive nuclear envelope permeability.', *The Journal of cell  
9 biology*. 149(5), pp. 1027–1038.
- 10 Shulga, N., Roberts, P., Gu, Z., Spitz, L., Tabb, M. M., Nomura, M. and Goldfarb, D. S.  
11 (1996) 'In vivo nuclear transport kinetics in *Saccharomyces cerevisiae*: a role for heat  
12 shock protein 70 during targeting and translocation.', *The Journal of cell biology*. 135(2),  
13 pp. 329–339.
- 14 Speese, SD., Ashley, J., Jokhi, V., Nunnari, J., Barria, R., Li, Y., Ataman, B., Koon, A.,  
15 Chang, YT., Li, Q, Moore, MJ., Budnik, V. 'Nuclear envelope budding enables large  
16 ribonucleoprotein particle export during synaptic Wnt signaling.' (2012) *Cell* 149(4), pp.  
17 832–846. doi: 10.1016/j.cell.2012.03.032.
- 18 Sung, M.-K. and Huh, W.-K. (2007) 'Bimolecular fluorescence complementation  
19 analysis system for in vivo detection of protein-protein interaction in *Saccharomyces  
20 cerevisiae*.' *Yeast* 24(9), pp. 767–775. doi: 10.1002/yea.1504.
- 21 Talamas, J. A. and Hetzer, M. W. (2011) 'POM121 and Sun1 play a role in early steps  
22 of interphase NPC assembly.', *The Journal of cell biology*. 194(1), pp. 27–37. doi:  
23 10.1083/jcb.201012154.
- 24 Tang, S., Henne, W. M., Borbat, P. P., Buchkovich, N. J., Freed, J. H., Mao, Y.,  
25 Fromme, J. C. and Emr, S. D. (2015) 'Structural basis for activation, assembly and  
26 membrane binding of ESCRT-III Snf7 filaments.', *eLife*, 4, p. 213. doi:  
27 10.7554/eLife.12548.
- 28 Teis, D., Saksena, S. and Emr, S. D. (2008) 'Ordered assembly of the ESCRT-III  
29 complex on endosomes is required to sequester cargo during MVB formation.',  
30 *Developmental cell*, 15(4), pp. 578–589. doi: 10.1016/j.devcel.2008.08.013.
- 31 Teis, D., Saksena, S., Judson, B. L. and Emr, S. D. (2010) 'ESCRT-II coordinates the  
32 assembly of ESCRT-III filaments for cargo sorting and multivesicular body vesicle  
33 formation.', *The EMBO journal*. EMBO Press, 29(5), pp. 871–883. doi:  
34 10.1038/emboj.2009.408.
- 35 Teo, H., Perisic, O., González, B. and Williams, R. L. (2004) 'ESCRT-II, an endosome-  
36 associated complex required for protein sorting: crystal structure and interactions with  
37 ESCRT-III and membranes.', *Developmental cell*, 7(4), pp. 559–569. doi:  
38 10.1016/j.devcel.2004.09.003.

- 1 Timney, B. L., Tetenbaum-Novatt, J., Agate, D. S., Williams, R., Zhang, W., Chait, B. T.  
2 and Rout, M. P. (2006) 'Simple kinetic relationships and nonspecific competition govern  
3 nuclear import rates in vivo.', *The Journal of cell biology*. 175(4), pp. 579–593. doi:  
4 10.1083/jcb.200608141.
- 5 Toyama, B. H., Savas, J. N., Park, S. K., Harris, M. S., Ingolia, N. T., Yates, J. R. and  
6 Hetzer, M. W. (2013) 'Identification of long-lived proteins reveals exceptional stability of  
7 essential cellular structures.', *Cell*, 154(5), pp. 971–982. doi: 10.1016/j.cell.2013.07.037.
- 8 Van Driessche, B., Tafforeau, L., Hentges, P., Carr, A. M. and Vandenhaute, J. (2005)  
9 'Additional vectors for PCR-based gene tagging in *Saccharomyces cerevisiae* and  
10 *Schizosaccharomyces pombe* using nourseothricin resistance.', *Yeast*, 22(13), pp.  
11 1061–1068. doi: 10.1002/yea.1293.
- 12 VanGompel, M. J. W., Nguyen, K. C. Q., Hall, D. H., Dauer, W. T. and Rose, L. S.  
13 (2015) 'A novel function for the *Caenorhabditis elegans* torsin OOC-5 in nucleoporin  
14 localization and nuclear import.', *Molecular biology of the cell*. 26(9), pp. 1752–1763.  
15 doi: 10.1091/mbc.E14-07-1239.
- 16 Vietri, M., Schink, K. O., Campsteijn, C., Wegner, C. S., Schultz, S. W., Christ, L.,  
17 Thoresen, S. B., Brech, A., Raiborg, C. and Stenmark, H. (2015) 'Spastin and ESCRT-  
18 III coordinate mitotic spindle disassembly and nuclear envelope sealing.', *Nature*. doi:  
19 10.1038/nature14408.
- 20 Vollmer, B., Lorenz, M., Moreno-Andrés, D., Bodenhöfer, M., De Magistris, P.,  
21 Astrinidis, S. A., Schooley, A., Flötenmeyer, M., Leptihn, S. and Antonin, W. (2015)  
22 'Nup153 Recruits the Nup107-160 Complex to the Inner Nuclear Membrane for  
23 Interphasic Nuclear Pore Complex Assembly.', *Developmental cell*, 33(6), pp. 717–728.  
24 doi: 10.1016/j.devcel.2015.04.027.
- 25 Vollmer, B., Schooley, A., Sachdev, R., Eisenhardt, N., Schneider, A. M., Sieverding,  
26 C., Madlung, J., Gerken, U., Macek, B. and Antonin, W. (2012) 'Dimerization and direct  
27 membrane interaction of Nup53 contribute to nuclear pore complex assembly.', *The*  
28 *EMBO journal*, 31(20), pp. 4072–4084. doi: 10.1038/emboj.2012.256.
- 29 Walther, T. C., Askjaer, P., Gentzel, M., Habermann, A., Griffiths, G., Wilm, M., Mattaj, I.  
30 W. and Hetzer, M. (2003) 'RanGTP mediates nuclear pore complex assembly.', *Nature*.  
31 424(6949), pp. 689–694. doi: 10.1038/nature01898.
- 32 Wandke, C. and Kutay, U. (2013) 'Enclosing chromatin: reassembly of the nucleus after  
33 open mitosis.', *Cell*, 152(6), pp. 1222–1225. doi: 10.1016/j.cell.2013.02.046.
- 34 Webster, B. M. and Lusk, C. P. (2015) 'ESCRTs breach the nuclear border.', *Nucleus*  
35 6(3), pp. 197–202. doi: 10.1080/19491034.2015.1035844.
- 36 Webster, B. M., Colombi, P., Jäger, J. and Lusk, C. P. (2014) 'Surveillance of nuclear  
37 pore complex assembly by ESCRT-III/Vps4.', *Cell*, 159(2), pp. 388–401. doi:  
38 10.1016/j.cell.2014.09.012.



- 1 Wente, S.R. and Blobel, G. 'A temperature-sensitive NUP116 null mutant forms a  
2 nuclear envelope seal over the yeast nuclear pore complex thereby blocking  
3 nucleocytoplasmic traffic.' (1993) *Journal of cell biology* 123(2), pp. 275–284.
- 4 Wernimont, A. K. and Weissenhorn, W. (2004) 'Crystal structure of subunit VPS25 of  
5 the endosomal trafficking complex ESCRT-II.', *BMC structural biology*. 4(1), p. 10. doi:  
6 10.1186/1472-6807-4-10.
- 7 Xiao, J., Chen, X.-W., Davies, B. A., Saltiel, A. R., Katzmann, D. J. and Xu, Z. (2009)  
8 'Structural basis of Ist1 function and Ist1-Did2 interaction in the multivesicular body  
9 pathway and cytokinesis.', *Molecular biology of the cell*. 20(15), pp. 3514–3524. doi:  
10 10.1091/mbc.E09-05-0403.
- 11 Yewdell, W. T., Colombi, P., Makhnevych, T. and Lusk, C. P. (2011) 'Luminal  
12 interactions in nuclear pore complex assembly and stability.', *Molecular biology of the  
13 cell*. 22(8), pp. 1375–1388. doi: 10.1091/mbc.E10-06-0554.
- 14 Zabel, U., Doye, V., Tekotte, H., Wepf, R., Grandi, P. and Hurt, E. C. (1996) 'Nic96p is  
15 required for nuclear pore formation and functionally interacts with a novel nucleoporin,  
16 Nup188p.', *The Journal of cell biology*. 133(6), pp. 1141–1152.
- 17 Zamborlini, A., Usami, Y., Radoshitzky, S. R., Popova, E., Palu, G. and Göttlinger, H.  
18 (2006) 'Release of autoinhibition converts ESCRT-III components into potent inhibitors  
19 of HIV-1 budding.', *Proceedings of the National Academy of Sciences*. 103(50), pp.  
20 19140–19145. doi: 10.1073/pnas.0603788103.
- 21

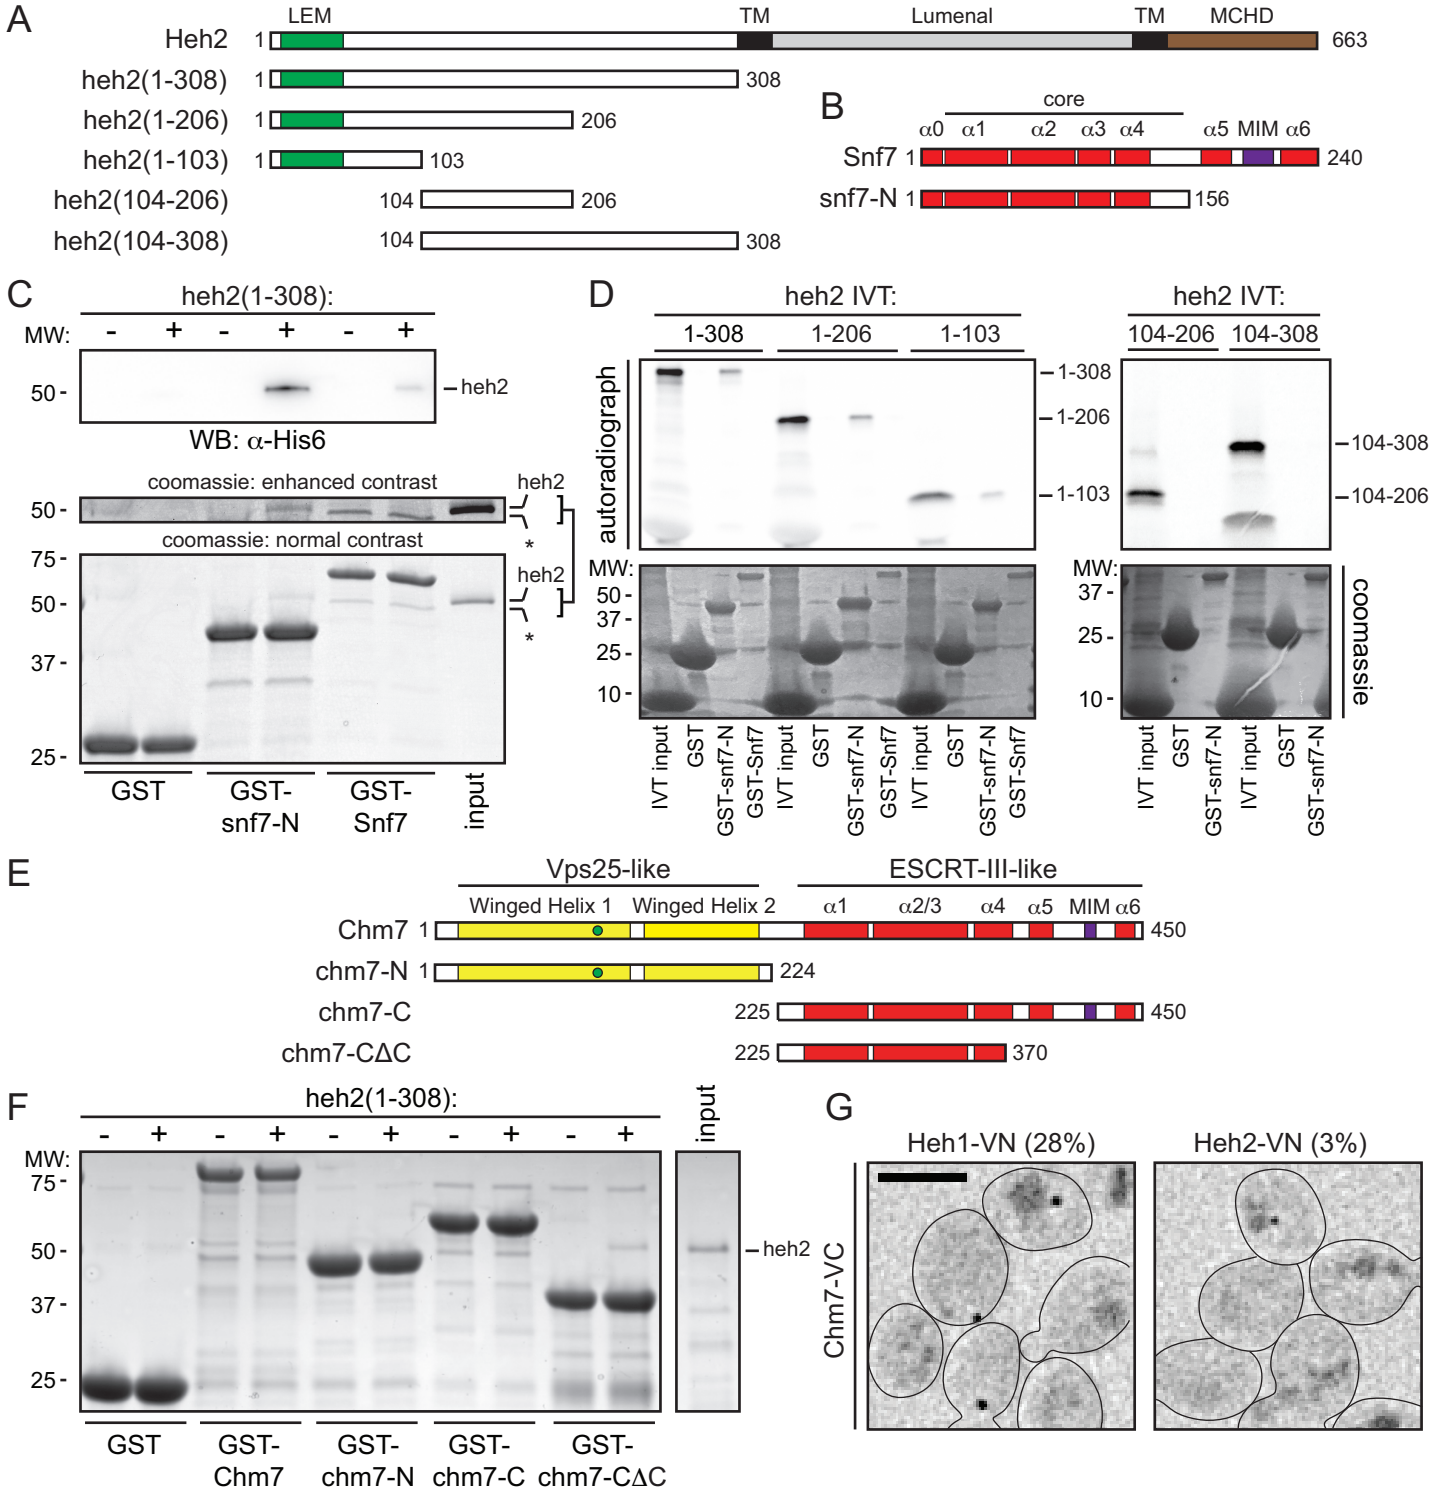

**Figure 1. Heh2 directly binds Snf7 and Chm7.**

**(A, B)** Schematics of the domain organization and secondary structure of Heh2 and Snf7 truncations. LEM is Lap2-Emerin-MAN1 domain (green), TM is transmembrane (black), MCHD is MAN1 C-terminal Homology Domain (brown), MIM is microtubule interacting motif (purple). Numbers are amino acid residues. **(C)** Recombinant purified GST, GST-Snf7 and GST-snf7-N were immobilized on GT-resin and incubated with buffer (-) or recombinant heh2(1-308)-His6. Bound proteins were eluted and separated by SDS-PAGE before detection by Western blot (top panel) or coomassie staining (bottom panel). Middle panel shows indicated cropped region of gel where contrast has been increased. Asterisk (\*) marks GST-Snf7 degradation product. Numbers on side of gel show position of molecular weight (MW) markers. **(D)** In vitro transcription translation (IVT) reactions generating radiolabeled (S35) truncations of Heh2 (inputs). IVT reaction mixes were incubated with bead bound GST, GST-snf7-N or GST-Snf7 before washing, elution and detection of bound proteins by autoradiography (top panel) or coomassie staining (bottom). **(E)** Predicted secondary and tertiary structure of Chm7 (see also Figure 1 - figure supplement 1) and generated truncations. **(F)** As in (C) except with GST-Chm7 constructs. SDS-PAGE gel is stained with coomassie. **(G)** BifC experiments with yeast strains (BWCPL1816, 1817) expressing endogenously tagged Chm7-VC and either Heh1-VN or Heh2-VN. Scale bar is 5  $\mu$ m. Deconvolved fluorescence micrographs shown are inverted. Percentages reflect the portion of population with detectable BifC signal ( $n > 100$ ).



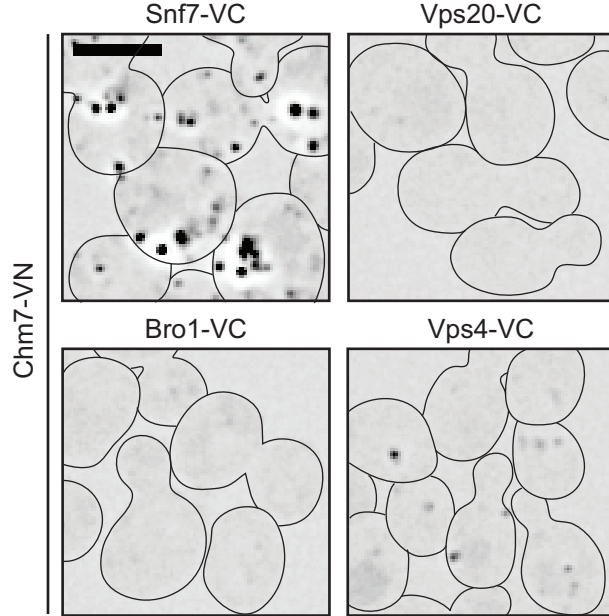

**Figure 1 – figure supplement 2. Chm7 interacts with Snf7 and Vps4 *in vivo*.**

BiFC experiments with strains (BWCPL1820-1823) expressing endogenously tagged Chm7-VN and either Snf7-VC, Vps20-VC, or Vps4-VC. Deconvolved fluorescence micrographs shown are inverted. Scale bar is 5  $\mu$ m.

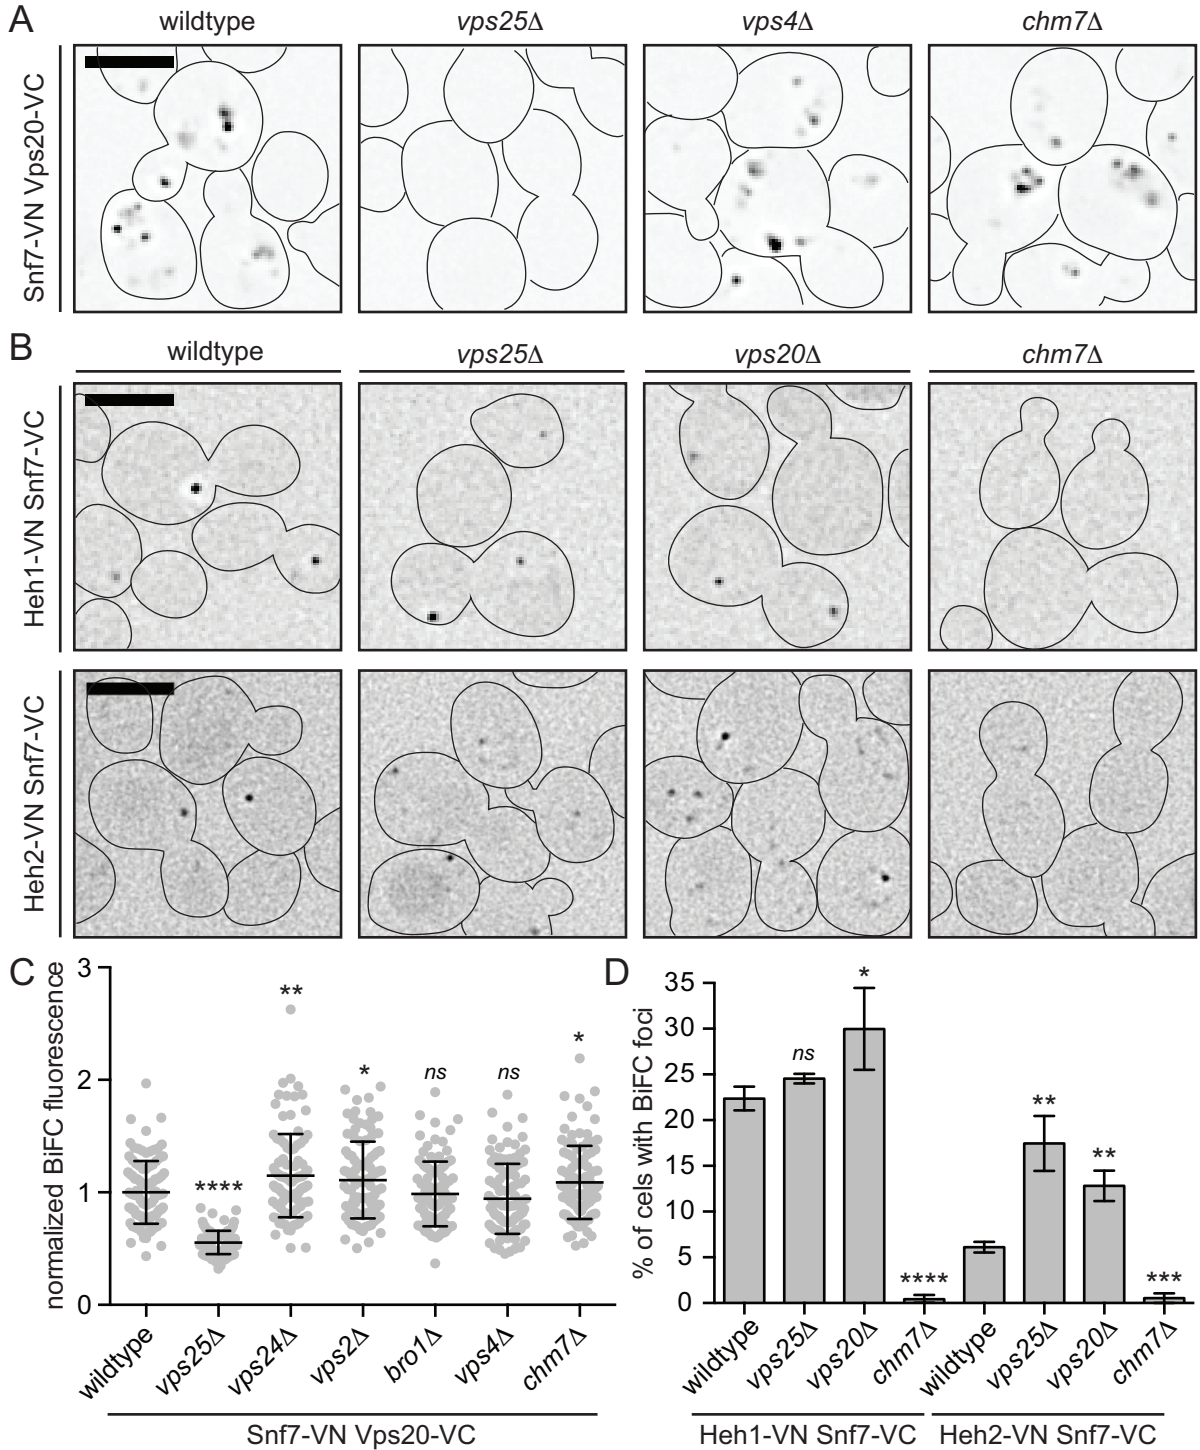

**Figure 2. Chm7 is required for Heh1/2-Snf7 interactions *in vivo*.**

**(A, B)** BiFC of the indicated VN and VC fusions in the indicated strains (BWCPL1809-1815, SOCPL07, 13, 18-19, BWCPL1798-1800). All fluorescent images are deconvolved and inverted. Scale bar is 5  $\mu$ m. See also Figure 2 - figure supplement 1 for levels of VN and VC fusions within individual strains. **(C)** Plot of the total BiFC fluorescence between Snf7-VN and Vps20-VC within individual cells of the indicated strains. Data are from three independent replicates where 100 cells per strain were quantified. Error bars are standard deviation from the mean of each replicate. Statistical significance calculated using un-paired student's T-test where ns represents  $p > 0.05$ ; \* is  $p \leq 0.05$ ; \*\* is  $p \leq 0.01$ ; \*\*\*\* is  $p \leq 0.0001$ . **(D)** Plot of the percentage of cells with detectable BiFC of the Heh1-VN Snf7-VC and Heh2-VN Snf7-VC pairs. Data are from three independent replicates where  $> 225$  cells per strain per replicate were quantified. Error bars represent standard deviation from the mean of each replicate. Statistical significance calculated using un-paired student's T-test where ns represents  $p > 0.05$ ; \* is  $p \leq 0.05$ ; \*\* is  $p \leq 0.01$ ; \*\*\* is  $p \leq 0.001$ ; \*\*\*\* is  $P \leq 0.0001$ .

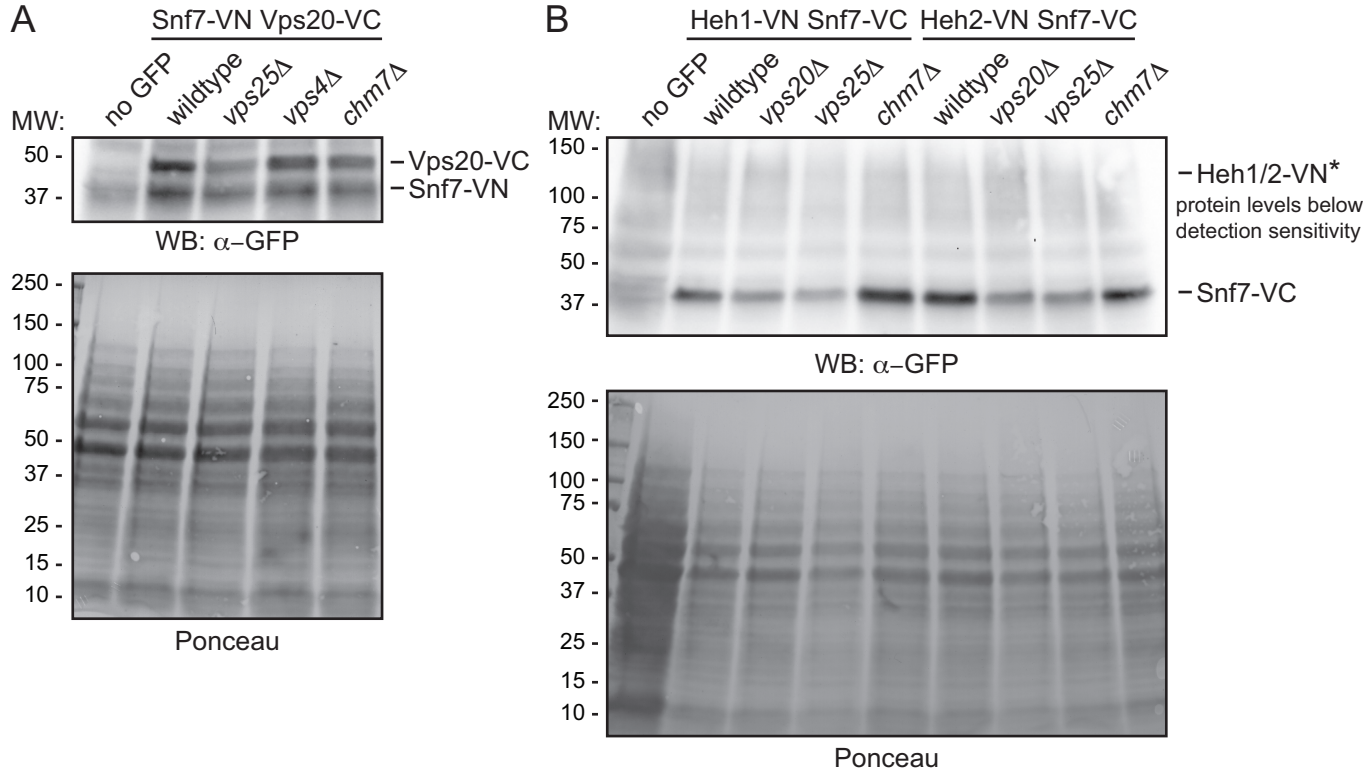

**Figure 2 – figure supplement 1. Split-venus fusion protein levels are unchanged in ESCRT null strains.**  
**(A, B)** Western blots (WB) with polyclonal anti-GFP antibodies that can detect both VN and VC fusions in the indicated strains (A: BWCPL1809, 1810, 1814, and 1815; B: SOCPL7, 13, 18-19). To assess relative protein loads, bottom panel shows corresponding ponceau-stained nitrocellulose membranes.

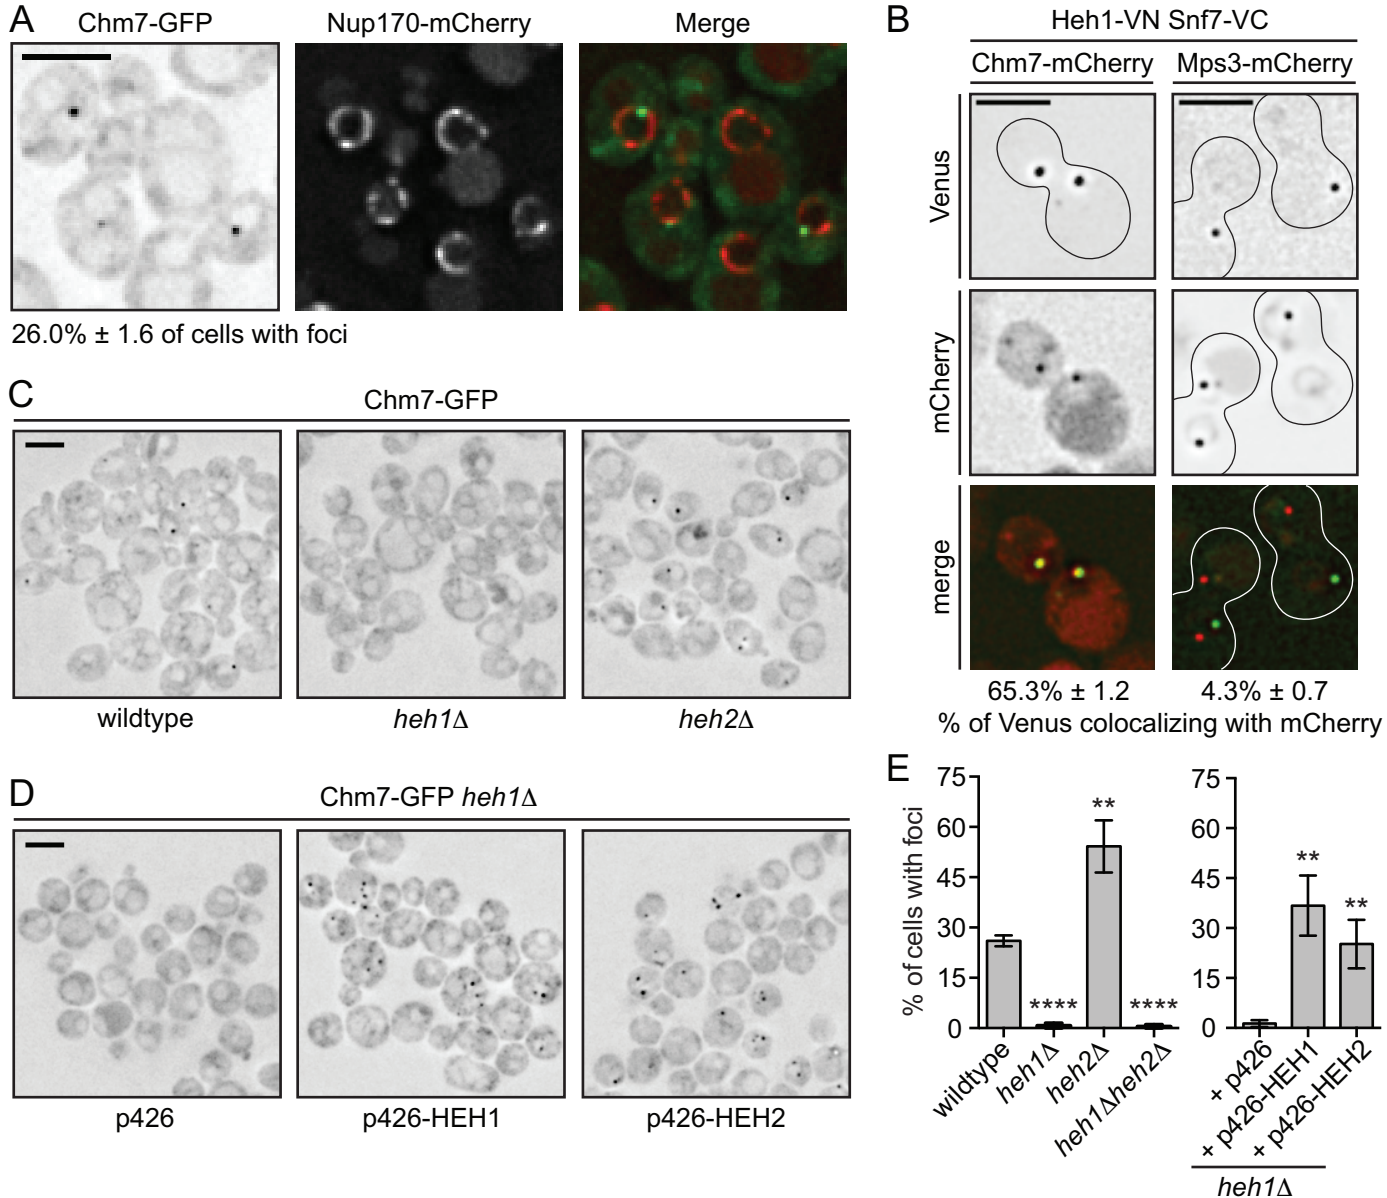

**Figure 3. Chm7 localization to a NE subdomain requires Heh1.**

**(A)** Deconvolved fluorescent micrographs of BWCPL1840 expressing Chm7-GFP (left) and Nup170-mCherry (middle) with merged image (right). Only the green channel is inverted. Scale bar is 5  $\mu$ m. Percentage of cells with Chm7-GFP NE-foci reflects the mean  $\pm$  standard deviation derived from 3 independent replicates where >200 cells were counted. **(B)** Deconvolved fluorescent micrographs of yeast strains expressing Heh1-VN and Snf7-VC with either Chm7-mCherry (BWCPL1842) or Mps3-mCherry (BWCPL1846). With the exception of the merge, all images are deconvolved inverted fluorescence micrographs. Scale bar is 5  $\mu$ m. Percentages reflect mean  $\pm$  standard deviation of the proportion of Chm7- or Mps3-mCherry foci that colocalize with Venus BiFC foci from 3 independent replicates where >40 Chm7- or >200 Mps3-mCherry foci were counted (See also Figure 3 – figure supplement 1B). **(C, D)** Deconvolved inverted fluorescence micrographs of the indicated strains (BWCPL1853-1855) expressing Chm7-GFP. In D, either an empty plasmid (p426) or those over-expressing *HEH1* or *HEH2* are introduced into the *heh1*Δ strain (BWCPL1853). **(E)** Plots of the percentage of cells from C and D with Chm7-GFP NE-foci. Data are from 3 independent replicates where >200 cells were counted for each strain. Error bars represent standard deviation from the mean. Statistical significance calculated using un-paired student's T-test where \*\* represents a p value  $\leq$  0.01 and \*\*\*\* is p  $\leq$  0.0001.

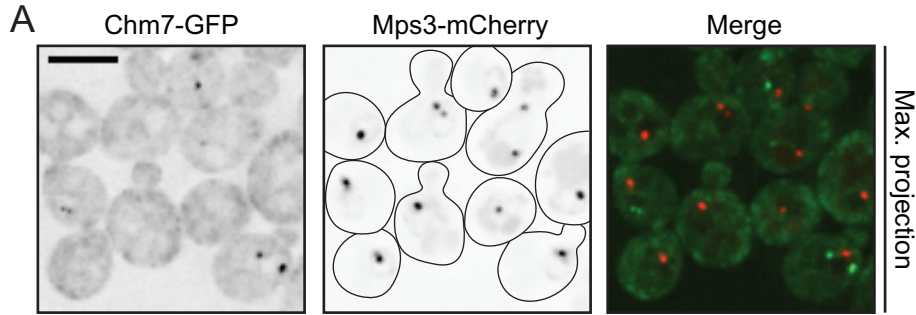

14.7%  $\pm$  5.0 of Chm7-GFP foci colocalize with SPBs

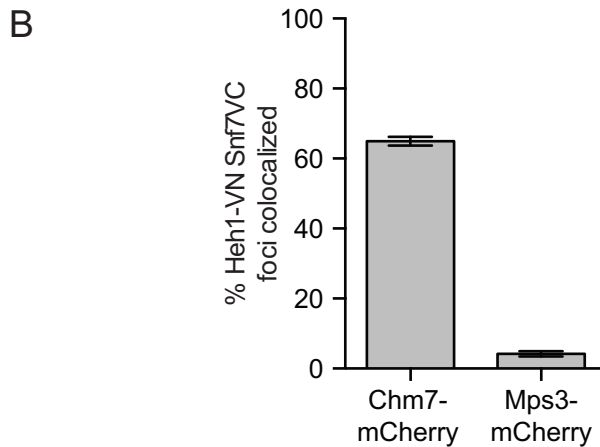

**Figure 3 – figure supplement 1. Chm7 does not associate with SPBs in the majority of cells at steady state.** **(A)** A maximum intensity projection of deconvolved fluorescent micrographs of BWCPL1838 expressing Chm7-GFP (inverted, left) and Nup170-mCherry (inverted, middle) with merged image (right). Maximum projections shown to facilitate visualization of GFP and mCherry foci; colocalization was assessed from single z-planes. Scale bar is 5  $\mu$ m. Percentage represents the mean  $\pm$  standard deviation of the proportion of Chm7-GFP NE foci that colocalize with Mps3-labeled SPBs from 3 independent replicates where  $>$  50 Chm7-GFP foci were counted. **(B)** Plot of the proportion of Heh1-VN Snf7-VC foci that colocalize with either Chm7-mCherry (BWCPL1842) or Mps3-mCherry (BWCPL1846). Data are from 3 independent replicates of  $>$  50 Chm7-GFP foci ( $\sim$ 150 cells). Bars represent standard deviation from the mean.



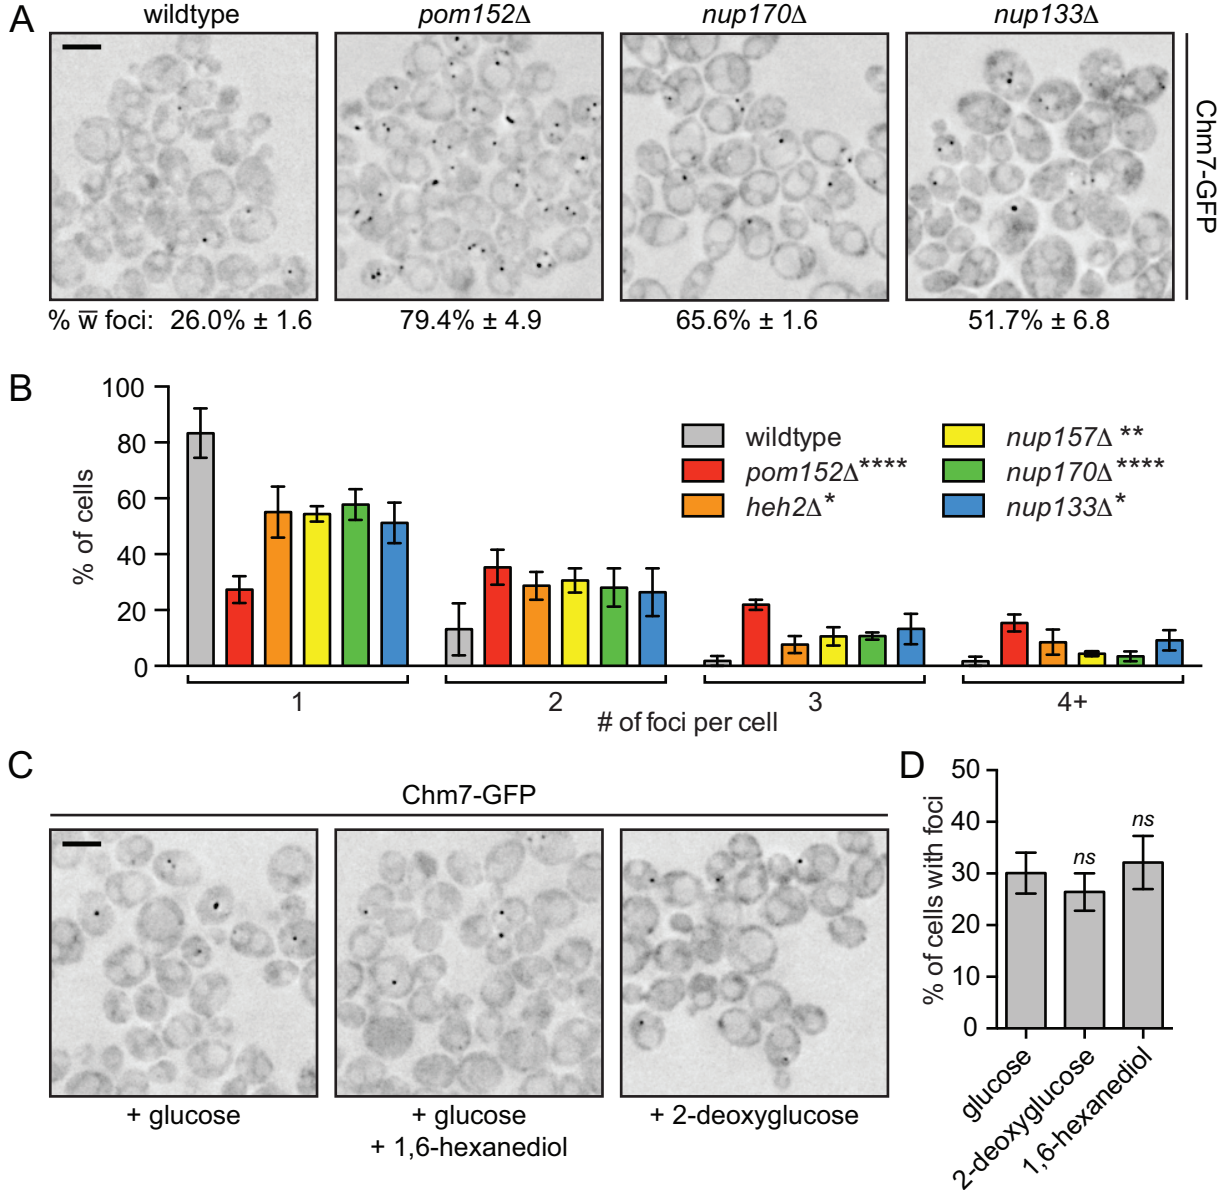

**Figure 4. Loss of nups, but not nuclear transport, affects Chm7 distribution.**

**(A)** Deconvolved inverted fluorescent micrographs of the indicated strains (DTCPL84, 88, 94 and BWCPL1867) expressing Chm7-GFP (percentage of cells with Chm7-GFP foci is shown at bottom of each panel, see also Figure 4 – figure supplement 1). Scale bar is 5  $\mu$ m. **(B)** Plot of the percentage of cells with the indicated number of Chm7-GFP foci. Error bars represent standard deviation from the mean from 3 independent replicates of > 50 foci per strain. Statistical significance calculated using a 2-way anova where \* represents a p value of  $\leq$  0.05; \*\* is  $p \leq$  0.01; \*\*\*\* is  $p \leq$  0.0001. **(C)** Deconvolved inverted fluorescent micrographs of Chm7-GFP expressing cells (BWCPL1635) grown in CSM with glucose (left) or glucose and 2% 1,6 hexanediol to perturb the NPC diffusion barrier (middle). In right panel, cells are first washed and resuspended in CSM lacking glucose supplemented with the energy poison 2-deoxyglucose to inhibit active nuclear transport. Scale bar is 5  $\mu$ m. **(D)** Plot of percentage of cells with Chm7-GFP foci. Data are from 3 independent replicates of >175 cells per condition. Error bars represent standard deviation from the mean. Statistical significance calculated using un-paired student's T-tests where ns represents  $p >$  0.05.

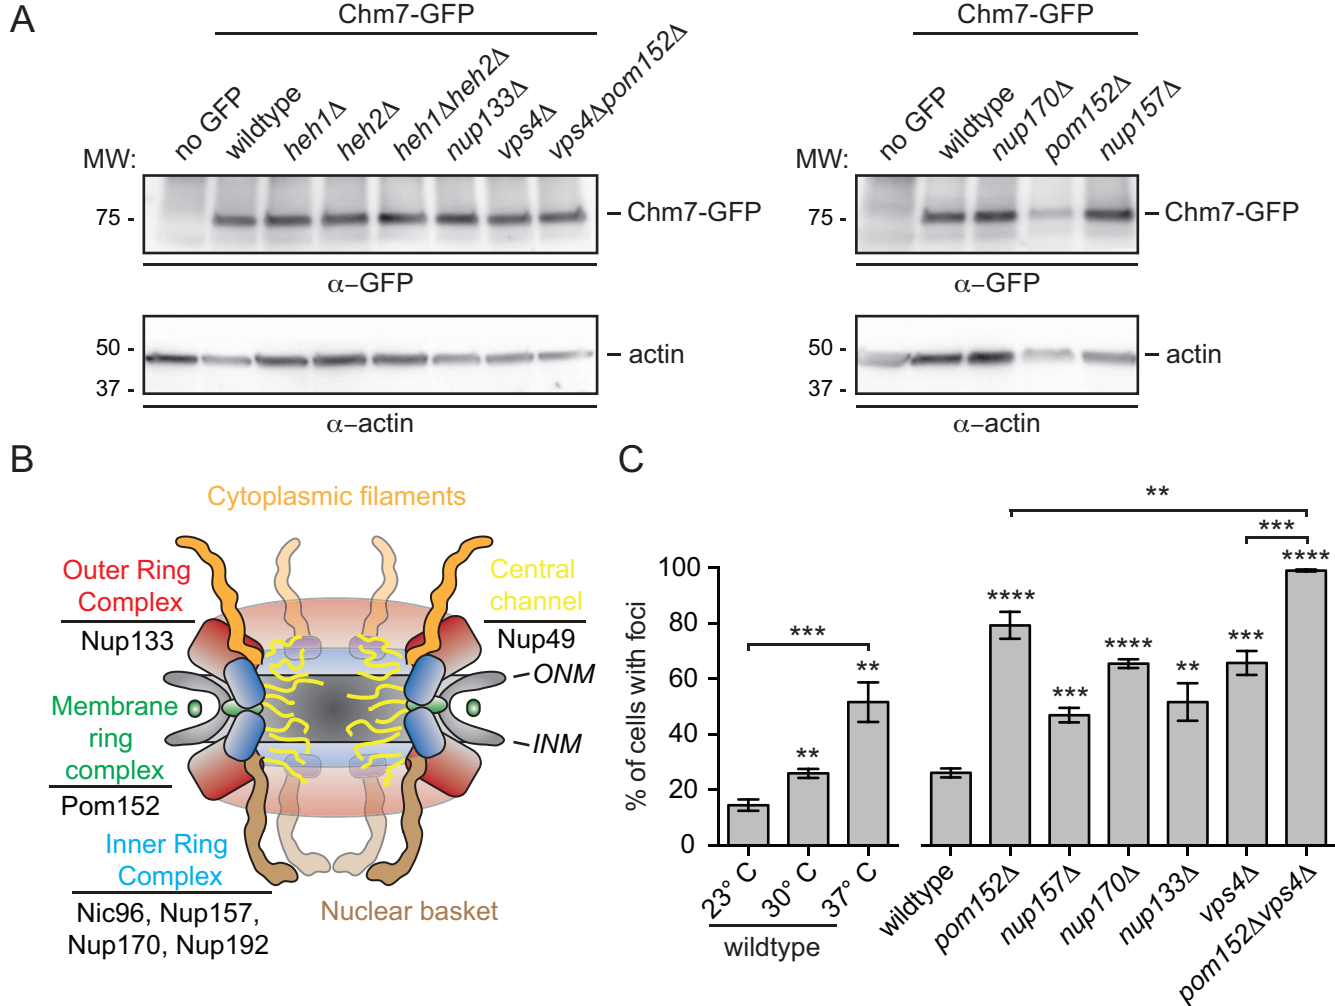

**Figure 4 – figure supplement 1. Chm7-GFP foci accumulate in nup knockouts.**

**(A)** Western blot of Chm7-GFP levels in the indicated strains (BWCPL1635, 1853-1855, 1867, DTCPL125, DTCPL131, DTCPL84, DTCPL88, DTCPL94) with actin loading control. **(B)** Schematic of the yeast NPC depicting nup subcomplexes (colors) and relevant subunits. Listed nups are referred to in text. **(C)** Plot of the percentage of cells with Chm7-GFP foci in the indicated strains (BWCPL1867, DTCPL125, DTCPL131, DTCPL84, DTCPL88, DTCPL94, DTCPL136). Error bars represent standard deviation from the mean from 3 independent experiments where > 175 cells per strain or condition were assessed. Statistical significance calculated using un-paired student's T-test where \*\* represents  $p \leq 0.01$ ; \*\*\* is  $p \leq 0.001$ ; \*\*\*\* is  $p \leq 0.0001$ .

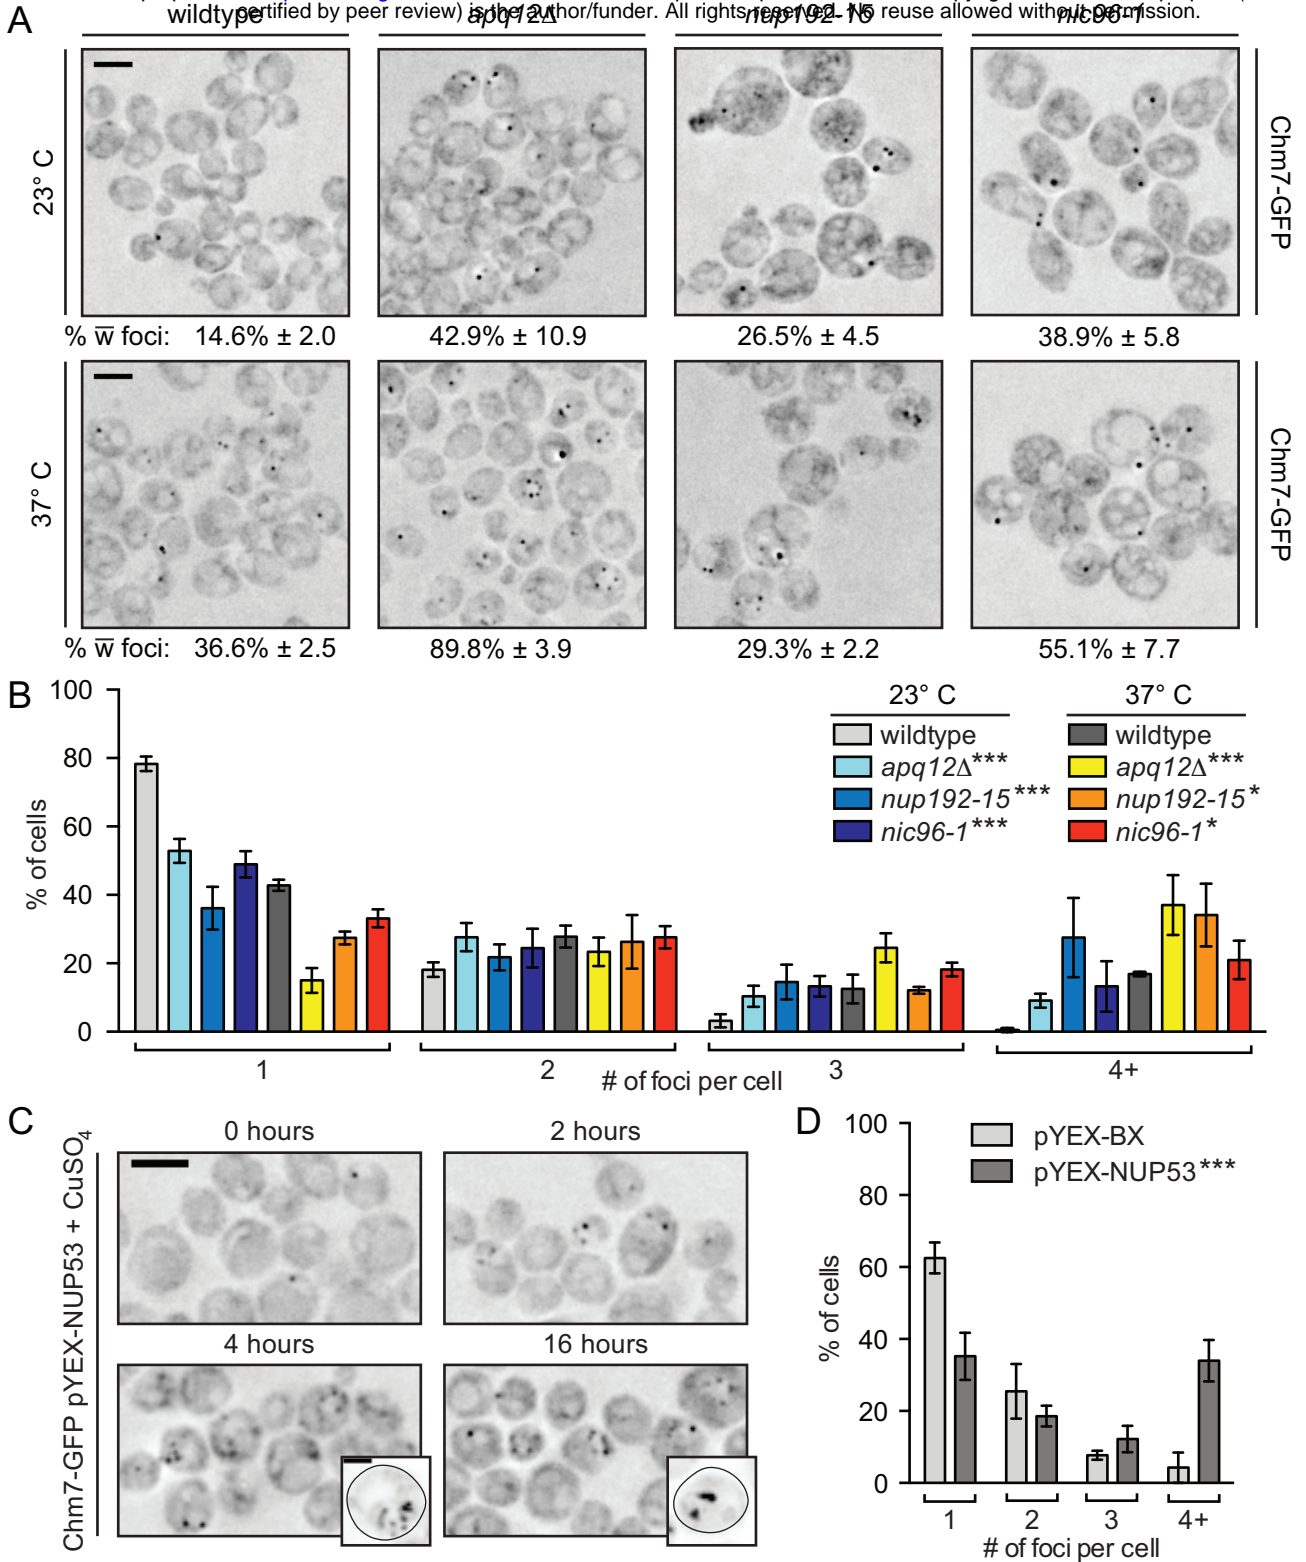

**Figure 5. Chm7 is recruited to the NE when NPC assembly is blocked.**

**(A)** Deconvolved inverted fluorescence micrographs of strains expressing Chm7-GFP in the indicated temperature sensitive NPC assembly-deficient strains (BWCPL1840, DTCPL136, DTCPL228, DTCPL183). Scale bar is 5  $\mu$ m. Top panels are at 23°C and bottom at 37°C. Percentages  $\pm$  standard deviation of the proportion of cells where Chm7-GFP foci are visible are shown on bottom of each panel (see also Figure 5 – figure supplement 1). **(B)** Plot of percentage of cells from (A) with the indicated number of Chm7-GFP foci. Error bars represent standard deviation from the mean from 3 independent replicates of > 50 foci per strain. Statistical significance assessed with 2-way anova where \* is  $p \leq 0.05$ ; \*\*\*,  $p \leq 0.001$ . **(C)** Deconvolved inverted fluorescent images of Chm7-GFP expressing cells containing pYEX-NUP53, which expresses *NUP53* behind the copper-inducible *CUP1* promoter. Nup53 overproduction was induced by the addition of  $\text{CuSO}_4$  at time 0. Scale bar is 5  $\mu$ m. Insets show maximum projection of cells where Chm7-GFP accumulates in patches reminiscent of intranuclear membranes induced by Nup53. Scale bar in inset is 2  $\mu$ m. **(D)** Plot of the percentage of cells after 3 h of  $\text{CuSO}_4$  induction with the indicated number of Chm7-GFP foci. Error bars represent standard deviation from the mean from 3 independent replicates of > 50 foci per strain. Statistical significance assessed by 2-way anova where \*\*\* is  $p \leq 0.001$ .

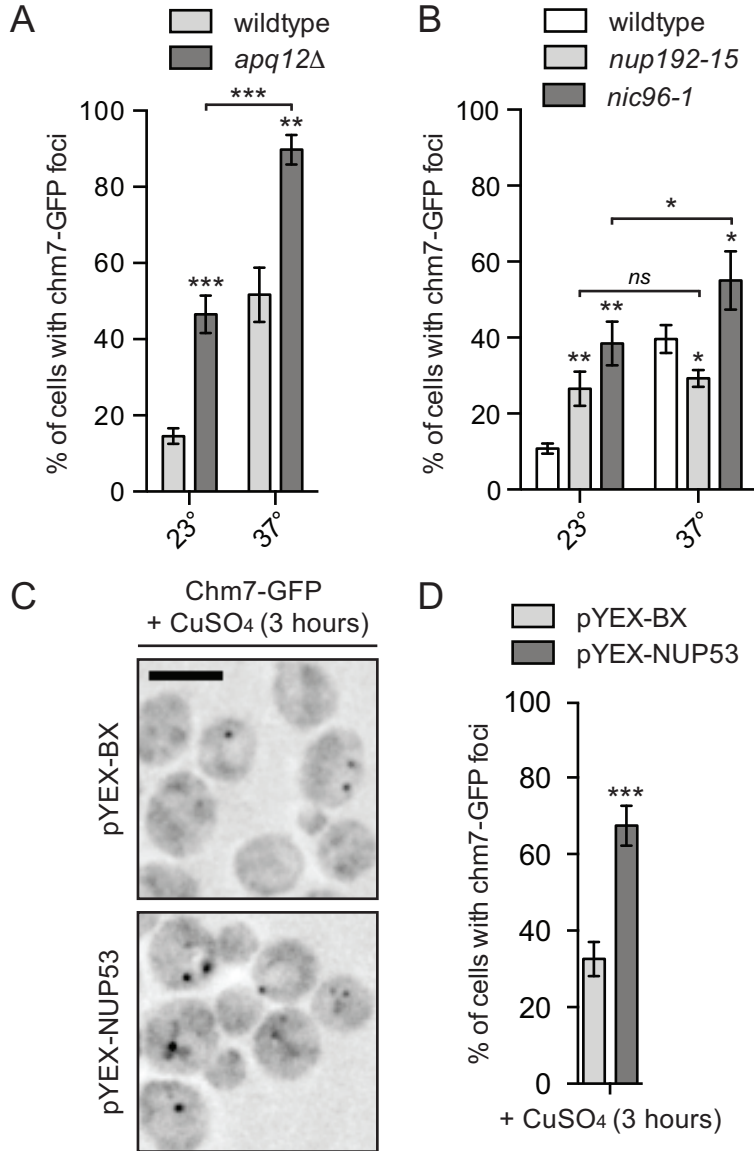

**Figure 5 – figure supplement 1. Chm7-GFP foci analysis in NPC assembly mutants.**

**(A,B, D)** Plot of the percentage of cells with Chm7-GFP foci in the indicated proportion of cells (DTCPL136, 228, 183, and BWCPL1635). Error bars represent standard deviation from the mean from 3 experiments of > 175 cells per strain or condition. Statistical significance calculated using un-paired student's T-tests where ns represents  $p > 0.05$ ; \* is  $p \leq 0.05$ ; \*\* is  $p \leq 0.01$ ; \*\*\* is  $p \leq 0.001$ . **(C)** Deconvolved inverted fluorescence micrographs of Chm7-GFP transformed with pYEX-BX or pYEX-BX-NUP53 in the presence of copper for 3 h. Scale bar is 5  $\mu$ m.

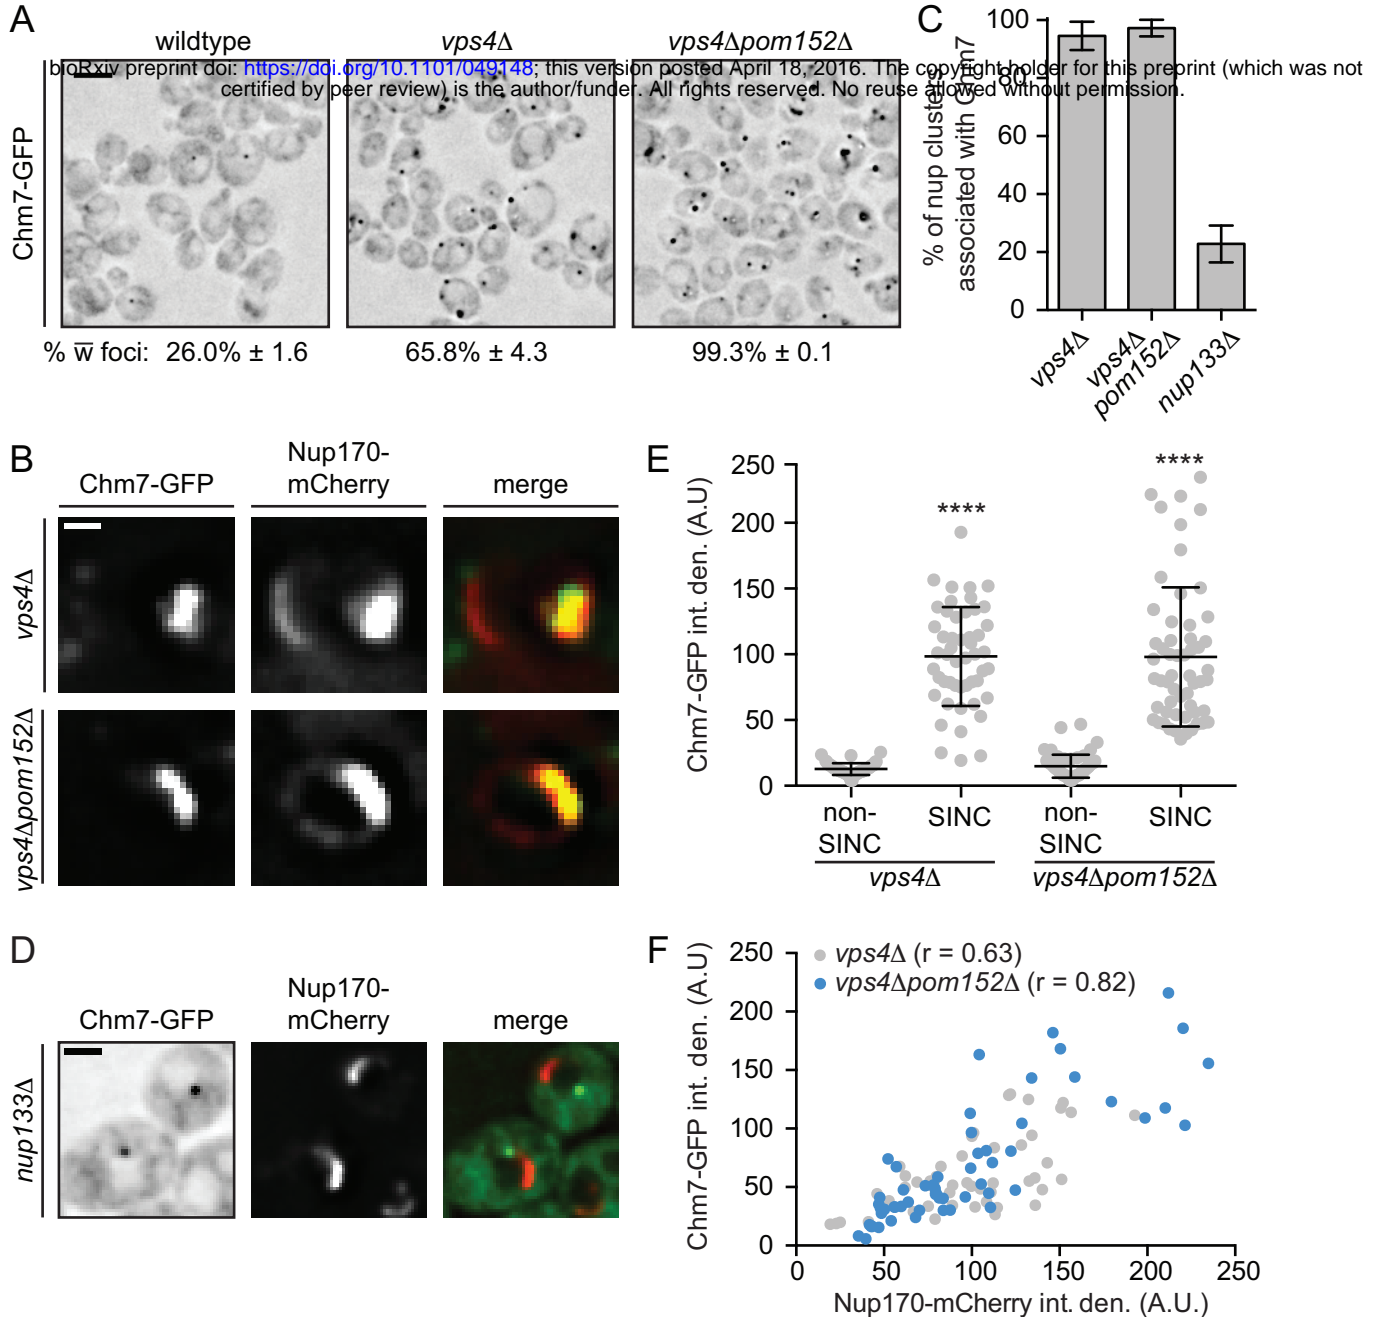

**Figure 6. Chm7 accumulates in the SINC.**

**(A)** Deconvolved inverted fluorescence micrographs of Chm7-GFP in the indicated strains (DTCPL163, 131). Scale bar is 5  $\mu$ m. The percentage of cells with Chm7-GFP foci is indicated below each panel (See also Figure 4 – figure supplement 1). **(B)** Representative deconvolved fluorescence images of SINC-containing nuclei in *vps4Δ* and *vps4Δpom152Δ* cells expressing Chm7-GFP and Nup170-mCherry (green, red and merged images are shown). Scale bar is 1  $\mu$ m. **(C)** Plot of the proportion of SINC in *vps4Δ* and *vps4Δpom152Δ* cells that colocalize with Chm7-GFP compared to its association with NPC clusters in *nup133Δ* cells (BWCPL1867). Error bars represent standard deviation of the mean where Chm7-GFP colocalization was assessed from > 50 NPC clusters in *nup133Δ* cells and 50 SINC in *vps4Δ* and *vps4Δpom152Δ* cells for 3 independent replicates. **(D)** Deconvolved fluorescent micrographs of BWCPL1867 expressing Chm7-GFP (left) and Nup170-mCherry (middle) with merged image (right). Only the green channel is inverted. Bar is 5  $\mu$ m. **(E)** Plot of the total fluorescence (A.U.) of Chm7-GFP within the SINC compared to Chm7-GFP foci not associated with the SINC in *vps4Δ* and *vps4Δpom152Δ* cells. Error bars represent standard deviation of the mean from > 50 SINC-associated Chm7-GFP or non-associated Chm7-GFP foci pooled from 3 independent replicates. Statistical significance calculated using un-paired student's T-tests where \*\*\*\* represents  $p \leq 0.0001$ . **(F)** Plot comparing the total fluorescence intensity of SINC enriched Chm7-GFP compared to Nup170-mCherry from individual SINC in *vps4Δ* (DTCPL163) and *vps4Δpom152Δ* (DTCPL131) cells. Linear regression calculated from 150 SINC pooled from 3 independent replicates;  $r$  represents the linear correlation (Pearson's) coefficient.

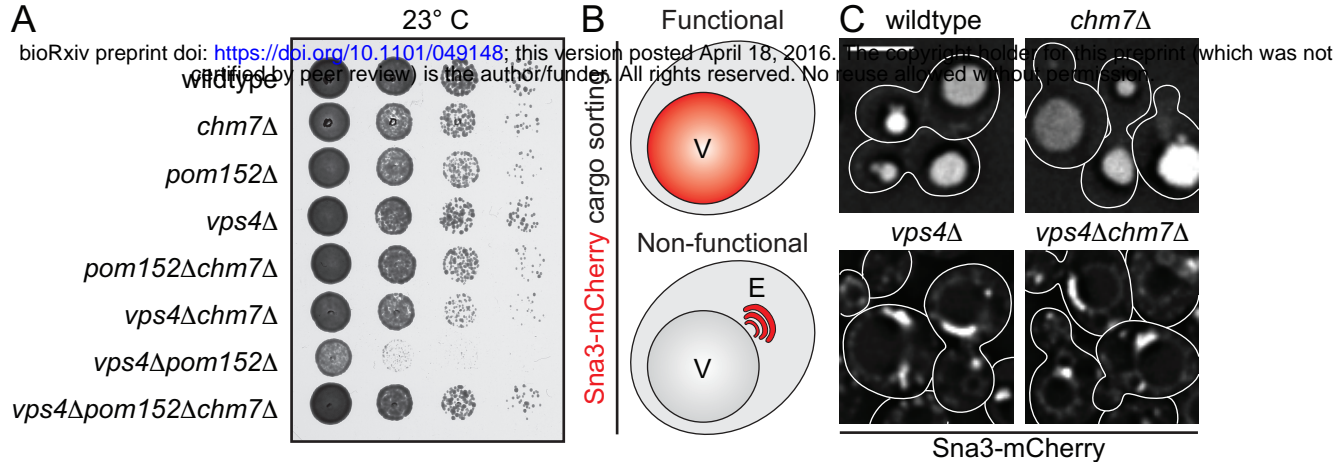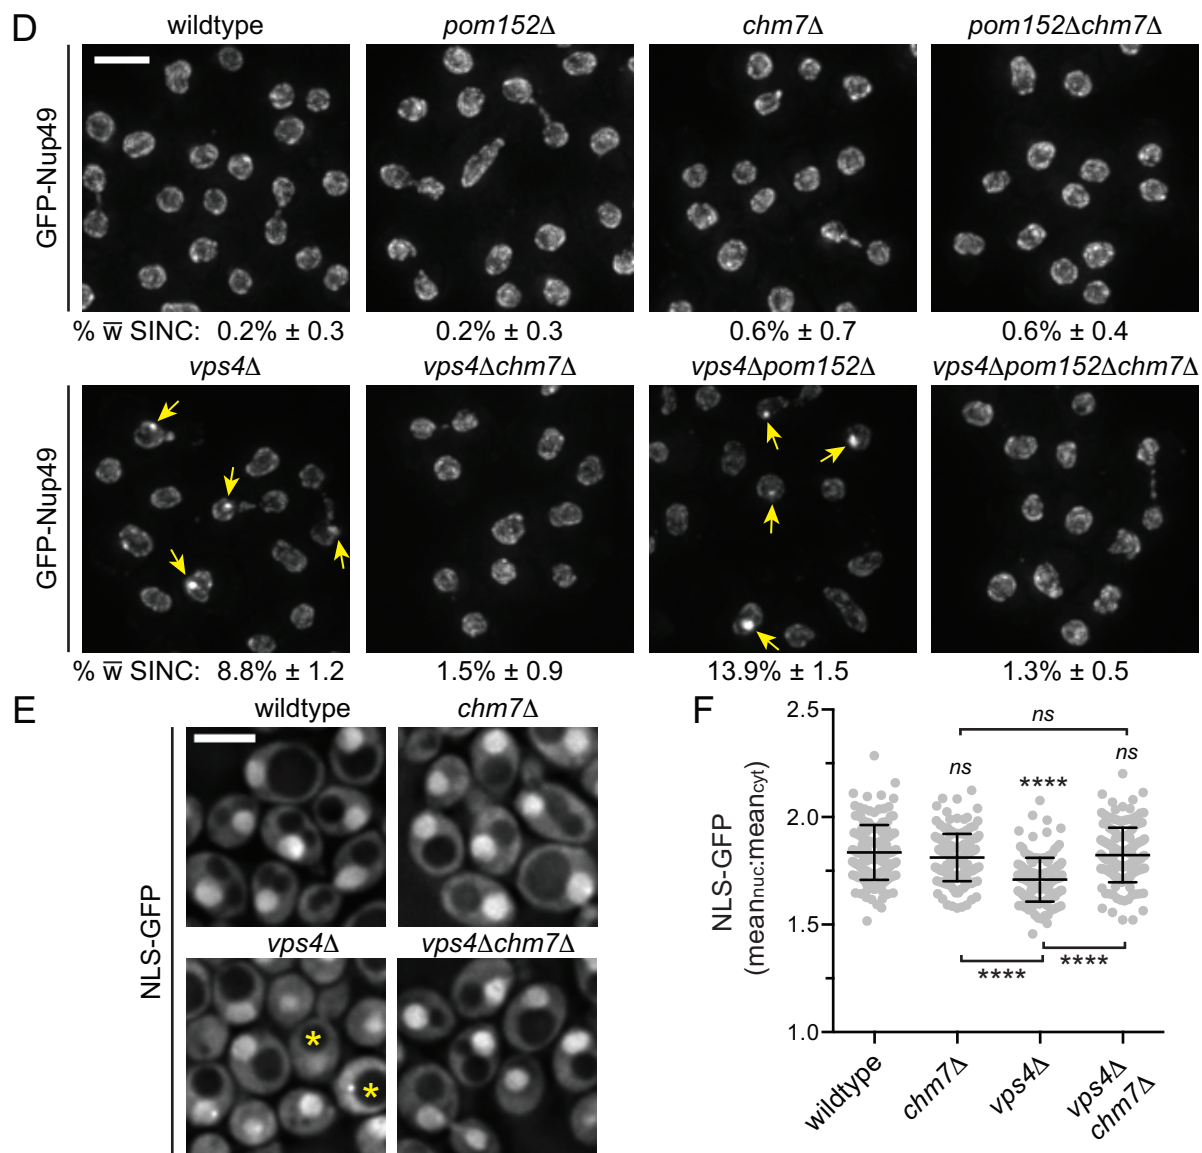

**Figure 7. CHM7 is required for SINC formation.**

**(A)** Deletion of *CHM7* rescues growth delays of *vps4Δpom152Δ* cells. 10-fold serial dilutions of the indicated yeast strains (BWCPL1769-1775) grown on YPD at 23°C for 3 days. **(B)** Schematic of Sna3-mCherry localization. Sna3 accumulates in the vacuole (V) or class E compartment (E) in cells with, or lacking, ESCRT function, respectively. **(C)** Deconvolved fluorescence micrographs of Sna3-mCherry in the indicated genetic backgrounds (BWCPL1829-1832). Scale bar is 5  $\mu$ m. **(D)** Deconvolved fluorescence micrographs of GFP-Nup49 in the indicated yeast strains. At bottom of each panel is the percentage of cells with SINC (see also Figure 7 – figure supplement 1). Yellow arrows point out SINC. **(E)** Deconvolved fluorescence micrographs of NLS-GFP in the indicated yeast strains (BWCPL1893-1896). The yellow asterisks point out cells with a loss of nuclear accumulation of the NLS-GFP reporter. Scale bar is 5  $\mu$ m. **(F)** Plot of the mean nuclear to cytosolic ratio of NLS-GFP from (E). Error bars represent standard deviation from the mean from 3 independent replicates of 150 cells for each strain. Statistical significance calculated using un-paired student's T-test where ns represents  $p > 0.05$ ; \*\* is  $p \leq 0.01$ ; \*\*\*\* is  $p \leq 0.0001$ .



Supplementary file 1 - Yeast strains table

| Name      | Genotype                                                                | Reference/Source                                           |
|-----------|-------------------------------------------------------------------------|------------------------------------------------------------|
| W303a     | <i>MATa, ade2-1 can1-100 his3-11,15 leu2-3,112 trp1-1 ura3-1</i>        | EUROSCARF                                                  |
| BWCPL258  | W303, <i>MPS3-mcherry::natMX6</i>                                       | PCR based integration using pFA6a-mCherry-natMX6 into W303 |
| BWCPL273  | W303, <i>vps24Δ::hphMX6</i>                                             | Webster et al, 2014                                        |
| BWCPL275  | W303, <i>vps2Δ::hphMX6</i>                                              | Webster et al, 2014                                        |
| BWCPL333  | W303, <i>vps4Δ::hphMX6</i>                                              | Webster et al, 2014                                        |
| BWCPL335  | W303, <i>vps20Δ::hphMX6</i>                                             | Webster et al, 2014                                        |
| BWCPL589  | W303, <i>pom152Δ::natMX6 vps4Δ::kanMX6</i>                              | Webster et al, 2014                                        |
| BWCPL594  | W303, <i>NUPI70-mcherry::kanMX6</i>                                     | Webster et al, 2014                                        |
| BWCPL612  | W303, <i>bro1Δ::hphMX6</i>                                              | Webster et al, 2014                                        |
| BWCPL656  | W303, <i>NUPI70-mcherry::kanMX6 pom152Δ::natMX6 vps4Δ::hphMX6</i>       | Webster et al, 2014                                        |
| BWCPL685  | W303, <i>vps25Δ::hphMX6</i>                                             | Webster et al, 2014                                        |
| BWCPL1184 | Ds1-2b, <i>nic96Δ::HIS</i> , pCH1122-URA3-ADE3-NIC96                    | Gift from E. Hurt: Y55020 - NIC96 shuffle                  |
| BWCPL1185 | <i>MATa, ade2, trp1, leu2, ura3, nup192::HIS3</i> pUN100-LEU2-nup192-15 | Gift from E. Hurt: YS1336 - nup192-15                      |
| BWCPL1208 | W303, <i>SNA3-mcherry::natMX6</i>                                       | PCR based integration using pFA6a-mCherry-natMX6 into W303 |
| BWCPL1270 | W303, <i>SNF7-VC::kanMX6</i>                                            | Webster et al, 2014                                        |
| BWCPL1272 | W303, <i>VPS20-VC::kanMX6</i>                                           | Webster et al, 2014                                        |
| BWCPL1274 | W303, <i>BRO1-VC::kanMX6</i>                                            | Webster et al, 2014                                        |
| BWCPL1276 | W303, <i>HEH1-VN::HIS3 SNF7-VC::kanMX6</i>                              | Webster et al, 2014                                        |
| BWCPL1280 | W303, <i>HEH2-VN::HIS3 SNF7-VC::kanMX6</i>                              | Webster et al, 2014                                        |
| BWCPL1368 | W303, <i>SNF7-VN::HIS3 VPS20-VC::kanMX6</i>                             | Webster et al, 2014                                        |
| BWCPL1470 | W303, <i>VPS4-VC::kanMX6</i>                                            | PCR based integration using pFA6a-VC-kanMX into W303       |
| BWCPL1631 | W303, <i>chm7Δ::hphMX6</i>                                              | PCR based integration using pFA6a-hphMX6 into W303         |
| BWCPL1635 | W303, <i>CHM7-GFP::HIS3</i>                                             | PCR based integration using pFA6a-HIS3 into W303           |
| BWCPL1769 | W303, <i>chm7Δ::hphMX6</i>                                              | Progeny from cross between BWCPL589 and BWCPL1631          |
| BWCPL1770 | W303, <i>pom152Δ::natMX6</i>                                            | Progeny from cross between BWCPL589 and BWCPL1631          |
| BWCPL1771 | W303, <i>vps4Δ::kanMX6</i>                                              | Progeny from cross between BWCPL589 and BWCPL1631          |
| BWCPL1772 | W303, <i>chm7Δ::hphMX6 pom152Δ::natMX6</i>                              | Progeny from cross between BWCPL589 and BWCPL1631          |
| BWCPL1773 | W303, <i>chm7Δ::hphMX6 vps4Δ::kanMX6</i>                                | Progeny from cross between BWCPL589 and BWCPL1631          |
| BWCPL1774 | W303, <i>pom152Δ::natMX6 vps4Δ::kanMX6</i>                              | Progeny from cross between BWCPL589 and BWCPL1631          |



Supplementary file 1 - Yeast strains table

| Name      | Genotype                                                      | Reference/Source                                    |
|-----------|---------------------------------------------------------------|-----------------------------------------------------|
| BWCPL1775 | W303, <i>chm7Δ::hphMX6 pom152Δ::natMX6 vps4Δ::kanMX6</i>      | Progeny from cross between BWCPL589 and BWCPL1631   |
| BWCPL1790 | W303, <i>HEH2-VN::HIS3 SNF7-VN::kanMX6 chm7Δ::hphMX6</i>      | Progeny from cross between BWCPL1280 with BWCPL1631 |
| BWCPL1798 | W303, <i>HEH2-VN::HIS3 SNF7-VN::kanMX6</i>                    | Progeny from cross between BWCPL1280 with BWCPL685  |
| BWCPL1799 | W303, <i>HEH2-VN::HIS3 SNF7-VN::kanMX6 vps25Δ::hphMX6</i>     | Progeny from cross between BWCPL1280 with BWCPL685  |
| BWCPL1800 | W303, <i>HEH2-VN::HIS3 SNF7-VN::kanMX6 vps20Δ::hphMX6</i>     | Progeny from cross between BWCPL1280 with BWCPL335  |
| BWCPL1809 | W303, <i>SNF7-VN::HIS3 VPS20-VC::kanMX6</i>                   | Progeny from cross between BWCPL1368 and BW685      |
| BWCPL1810 | W303, <i>SNF7-VN::HIS3 VPS20-VC::kanMX6 vps25Δ::hphMX6</i>    | Progeny from cross between BWCPL1368 and BW685      |
| BWCPL1811 | W303, <i>SNF7-VN::HIS3 VPS20-VC::kanMX6 vps24Δ::hphMX6</i>    | Progeny from cross between BWCPL1368 and BWCPL273   |
| BWCPL1812 | W303, <i>SNF7-VN::HIS3 VPS20-VC::kanMX6 vps2Δ::hphMX6</i>     | Progeny from cross between BWCPL1368 and BWCPL275   |
| BWCPL1813 | W303, <i>SNF7-VN::HIS3 VPS20-VC::kanMX6 bro1Δ::hphMX6</i>     | Progeny from cross between BWCPL1368 and BWCPL612   |
| BWCPL1814 | W303, <i>SNF7-VN::HIS3 VPS20-VC::kanMX6 vps4Δ::hphMX6</i>     | Progeny from cross between BWCPL1368 and BWCPL333   |
| BWCPL1815 | W303, <i>SNF7-VN::HIS3 VPS20-VC::kanMX6 chm7Δ::hphMX6</i>     | Progeny from cross between BWCPL1368 and BWCPL1631  |
| BWCPL1816 | W303, <i>HEH1-VN::HIS3 CHM7-VC::kanMX6</i>                    | Progeny from cross between BWCPL1870 and CPL1282    |
| BWCPL1817 | W303, <i>HEH2-VN::HIS3 CHM7-VC::kanMX6</i>                    | Progeny from cross between BWCPL1870 and CPL1283    |
| BWCPL1820 | W303, <i>CHM7-VN::HIS3 VPS20-VC::kanMX6</i>                   | Progeny from cross between BWCPL1869 and BW1272     |
| BWCPL1821 | W303, <i>CHM7-VN::HIS3 SNF7-VC::kanMX6</i>                    | Progeny from cross between BWCPL1869 and BW1270     |
| BWCPL1822 | W303, <i>CHM7-VN::HIS3 VPS4-VC::kanMX6</i>                    | Progeny from cross between BWCPL1869 and BW1470     |
| BWCPL1823 | W303, <i>CHM7-VN::HIS3 BRO1-VC::kanMX6</i>                    | Progeny from cross between BWCPL1869 and BW1274     |
| BWCPL1829 | W303, <i>SNA3-mcherry::natMX6</i>                             | Progeny from cross between BWCPL1208 and BWCPL1773  |
| BWCPL1830 | W303, <i>SNA3-mcherry::natMX6 chm7Δ::hphMX6</i>               | Progeny from cross between BWCPL1208 and BWCPL1773  |
| BWCPL1831 | W303, <i>SNA3-mcherry::natMX6 vps4Δ::kanMX6</i>               | Progeny from cross between BWCPL1208 and BWCPL1773  |
| BWCPL1832 | W303, <i>SNA3-mcherry::natMX6 chm7Δ::hphMX6 vps4Δ::kanMX6</i> | Progeny from cross between BWCPL1208 and BWCPL1773  |

Supplementary file 1 - Yeast strains table

| Name      | Genotype                                                                     | Reference/Source                                                               |
|-----------|------------------------------------------------------------------------------|--------------------------------------------------------------------------------|
| BWCPL1834 | W303, <i>NUP170-mcherry::natMX6</i>                                          | Webster et al, 2014                                                            |
| BWCPL1836 | W303, <i>CHM7-mcherry::natMX6</i>                                            | PCR based integration using pFA6a-mCherry-natMX6 into W303                     |
| BWCPL1838 | W303, <i>CHMP7-GFP::HIS3 MPS3-mcherry::natMX6</i>                            | Progeny from cross between BWCPL1635 with BWCPL258                             |
| BWCPL1840 | W303, <i>CHMP7-GFP::HIS3 NUP170-mcherry::natMX6</i>                          | Progeny from cross between BWCPL1635 with BWCPL1834                            |
| BWCPL1842 | W303, <i>HEH1-VN::HIS3 SNF7-VC::kanMX6 CHM7-mcherry::natMX6</i>              | Progeny from cross between BWCPL1836 with BWCPL1276                            |
| BWCPL1846 | W303, <i>HEH1-VN::HIS3 SNF7-VC::kanMX6 MPS3-mcherry::natMX6</i>              | Progeny from cross between BWCPL258 with BWCPL1276                             |
| BWCPL1853 | W303, <i>CHM7-GFP::HIS3 NUP170-mCherry::natMX6 heh1Δ::TRP1</i>               | Progeny from cross between CPL1202 with BWCPL1834                              |
| BWCPL1854 | W303, <i>CHM7-GFP::HIS3 NUP170-mCherry::natMX6 heh2Δ::natMX6</i>             | Progeny from cross between CPL1202 with BWCPL1834                              |
| BWCPL1855 | W303, <i>CHM7-GFP::HIS3 NUP170-mCherry::natMX6 heh1Δ::TRP1 heh2Δ::natMX6</i> | Progeny from cross between CPL1202 with BWCPL1834                              |
| BWCPL1867 | BY4741, <i>nup133Δ::kanMX6 CHMP7-GFP::HIS3 NUP170-mcherry::natMX6</i>        | PCR based integration using pFA6a-GFP-HIS3 and pFA6a-mcherry-natMX into CPL337 |
| BWCPL1869 | W303, <i>CHM7-VN::HIS3</i>                                                   | PCR based integration using pFA6a-VN-HIS3 into W303                            |
| BWCPL1870 | W303, <i>CHM7-VC::kanMX6</i>                                                 | PCR based integration using pFA6a-VC-kanMX into W303                           |
| BWCPL1893 | W303, <i>NLS-GFP::URA</i>                                                    | Progeny from cross between PCCPL373 and BWCPL1773                              |
| BWCPL1894 | W303, <i>vps4Δ::kanMX6 NLS-GFP::URA</i>                                      | Progeny from cross between PCCPL373 and BWCPL1773                              |
| BWCPL1895 | W303, <i>chm7Δ::hphMX6 NLS-GFP::URA</i>                                      | Progeny from cross between PCCPL373 and BWCPL1773                              |
| BWCPL1896 | W303, <i>vps4Δ::kanMX6 chm7Δ::hphMX6 NLS-GFP::URA</i>                        | Progeny from cross between PCCPL373 and BWCPL1773                              |
| CPL117    | W303, <i>heh1Δ::TRP1</i>                                                     | Yewdell et al, 2011                                                            |
| CPL158    | W303, <i>nup170Δ::kanMX6</i>                                                 | King et al, 2006                                                               |
| CPL337    | BY4741, <i>nup133Δ::kanMX6</i>                                               | Webster et al, 2014                                                            |
| CPL398    | W303, <i>pom152Δ::kanMX6</i>                                                 | Yewdell et al, 2011                                                            |
| CPL783    | W303, <i>apq12Δ::kanMX6</i>                                                  | Yewdell et al, 2011                                                            |
| CPL804    | W303, <i>heh2Δ::natMX6</i>                                                   | Yewdell et al, 2011                                                            |
| CPL1202   | W303, <i>heh1Δ::TRP1 heh2Δ::natMX6</i>                                       | Progeny from cross between CPL117 with CPL804                                  |
| CPL1278   | W303, <i>nup157Δ::hphMX6::kanMX6</i>                                         | PCR based integration using pFA6a-kanMX6 into PCCPL240                         |
| CPL1282   | W303, <i>HEH1-VN::HIS3</i>                                                   | Webster et al, 2014                                                            |
| CPL1283   | W303, <i>HEH2-VN::HIS3</i>                                                   | Webster et al, 2014                                                            |

Supplementary file 1 - Yeast strains table

| Name     | Genotype                                                                               | Reference/Source                                              |
|----------|----------------------------------------------------------------------------------------|---------------------------------------------------------------|
| DTCPL84  | W303, <i>CHM7-GFP::HIS3 MPS3-mcherry::natMX6 nup170Δ::kanMX6</i>                       | Progeny from cross between BWCPL1838 and DTCPL85              |
| DTCPL88  | W303, <i>CHM7-GFP::HIS3 MPS3-mcherry::natMX6 pom152Δ::kanMX6</i>                       | Progeny from cross between BWCPL1838 and CPL398               |
| DTCPL94  | W303, <i>CHM7-GFP::HIS3 MPS3-mcherry::natMX6 nup157Δ::kanMX6</i>                       | Progeny from cross between BWCPL1838 and CPL1278              |
| DTCPL125 | W303, <i>CHM7-GFP::HIS3 vps4Δ::hphMX6</i>                                              | Progeny from cross between BWCPL656 and BWCPL1635             |
| DTCPL131 | W303, <i>CHM7-GFP::HIS3 NUP170-mcherry::kanMX6 pom152Δ::natMX6 vps4Δ::hphMX6</i>       | Progeny from cross between BWCPL656 and BWCPL1635             |
| DTCPL132 | W303, <i>CHM7-GFP::HIS3 NUP170-mcherry::kanMX6 pom152Δ::natMX6</i>                     | Progeny from cross between BWCPL656 and BWCPL1635             |
| DTCPL136 | W303, <i>CHM7-GFP::HIS3 NUP170-mcherry::kanMX6 apq12::natMX6</i>                       | Progeny from cross between DTCPL160 and BWCPL1635             |
| DTCPL160 | W303, <i>NUP170-mcherry::kanMX6 apq12Δ::natMX6</i>                                     | Progeny from cross between BWCPL594 and PCCPL249              |
| DTCPL163 | W303, <i>CHM7-GFP::HIS3 NUP170-mcherry::kanMX6 vps4Δ::hphMX6</i>                       | Progeny from cross between BWCPL656 and BWCPL1635             |
| DTCPL183 | Ds1-2b, <i>nic96Δ::HIS3 CHM7-EGFP::kanMX6, pCH1122-URA3-ADE3-NIC96</i>                 | PCR based integration using pFA6a-mEGFP-kanMX6 into BWCPL1184 |
| DTCPL228 | <i>MATa, ade2, trp1, leu2, ura3, nup192::HIS3 pUN100-LEU2-nup192-15 CHM7-GFP::HIS3</i> | PCR based integration using pFA6a-GFP-kanMX6 into BWCPL1185   |
| PCCPL240 | W303, <i>nup157Δ::hphMX6</i>                                                           | Yewdell et al, 2011                                           |
| PCCPL249 | W303, <i>apq12Δ::kanMX6::natMX6</i>                                                    | PCR based integration using pFA6a-kanMX6 into CPL783          |
| PCCPL373 | W303, <i>NLS-GFP::URA</i>                                                              | Webster et al, 2014                                           |
| SOCPL7   | W303, <i>HEH1-VN::HIS3 SNF7-VC::kanMX6 vps20Δ::hphMX6</i>                              | Progeny from cross between BWCPL1276 with BWCPL335            |
| SOCPL13  | W303, <i>HEH1-VN::HIS3 SNF7-VC::kanMX6 vps25Δ::hphMX6</i>                              | Progeny from cross between BWCPL1276 with BWCPL685            |
| SOCPL18  | W303, <i>HEH1-VN::HIS3 SNF7-VC::kanMX6</i>                                             | Progeny from cross between BWCPL1276 with BWCPL335            |
| SOCPL19  | W303, <i>HEH1-VN::HIS3 SNF7-VC::kanMX6 chm7Δ::hphMX6</i>                               | Progeny from cross between BWCPL1276 with BWCPL1631           |

Supplementary File 2 - Plasmids Table

| <b>Name</b>          | <b>Description</b>                                                            | <b>Reference/Source</b>        |
|----------------------|-------------------------------------------------------------------------------|--------------------------------|
| pCPLJJ10             | pGEX-6p-1, GST-Snf7                                                           | This study                     |
| pCPLJJ11             | pGEX-6p-1, GST-snf7(1-156)                                                    | This study                     |
| pCPLJJ26             | pET28a, heh2-N(1-308)-His6                                                    | This study                     |
| pCPLJJ29             | pCS2, heh2(1-103)                                                             | This study                     |
| pCPLJJ30             | pCS2, heh2(104-206)                                                           | This study                     |
| pCPLJJ31             | pCS2, heh2(207-308)                                                           | This study                     |
| pCPLJJ32             | pCS2, heh2(1-206)                                                             | This study                     |
| pCPLJJ33             | pCS2, heh2(104-308)                                                           | This study                     |
| pCPLJJ50             | pGEX-6p-1, GST-Chm7                                                           | This study                     |
| pCPLJJ57             | pET28a, chm7-N                                                                | This study                     |
| pCPLJJ59             | pGEX-6p-1, GST-chm7-C(226-450)                                                | This study                     |
| pCPLJJ60             | pGEX-6p-1, GST-chm7-N(1-225)-His <sub>6</sub>                                 | This study                     |
| pCPLJJ63             | pGEX-6p-1, GST-chm7-CΔC(225-370)                                              | This study                     |
| pCPLJJ65             | GST-heh2(1-308)-His6                                                          | This study                     |
| pCPLJJ8              | pCS2, heh2(1-308)                                                             | This study                     |
| pCS2                 | for in vitro transcript/translation expression in rabbit reticulocyte lysates | Gift from T. Carroll           |
| pFA6a-GFP-HIS3MX6    | Template for PCR based chromosomal integration of GFP ORF                     | Longtine et al., 1998          |
| pFA6a-GFP-kanMX6     | Template for PCR based chromosomal integration of GFP ORF                     | Longtine et al., 1998          |
| pFA6a-hphMX6         | Template for PCR based chromosomal integration of hphMX6 cassette             | Longtine et al., 1998          |
| pFA6a-kanMX6         | Template for PCR based chromosomal integration of kanMX6 cassette             | Longtine et al., 1998          |
| pFA6a-mCherry-kanMX6 | Template for PCR based chromosomal integration of mCherry ORF                 | EUROSCARF                      |
| pFA6a-mCherry-natMX6 | Template for PCR based chromosomal integration of mCherry ORF                 | EUROSCARF                      |
| pFA6a-mEGFP-kanMX6   | Template for PCR based chromosomal integration of monomeric EGFP ORF          | Gift from T. Pollard           |
| pFA6a-natMX6         | Template for PCR based chromosomal integration of natMX6 cassette             | Van Driessche et al., 2005     |
| pFA6a-TRP1MX6        | Template for PCR based chromosomal integration of TRP1MX6 cassette            | Longtine et al., 1998          |
| pFA6a-VC-HIS3MX6     | Template for PCR based chromosomal integration of VC (split-Venus) ORF        | EUROSCARF (Sung and Huh, 2007) |
| pFA6a-VC-kanMX6      | Template for PCR based chromosomal integration of VC (split-Venus) ORF        | EUROSCARF (Sung and Huh, 2007) |
| pFA6a-VN-HIS3MX6     | Template for PCR based chromosomal integration of VN (split-Venus) ORF        | EUROSCARF (Sung and Huh, 2007) |

Supplementary File 2 - Plasmids Table

| <b>Name</b>      | <b>Description</b>                                                                                    | <b>Reference/Source</b>                       |
|------------------|-------------------------------------------------------------------------------------------------------|-----------------------------------------------|
| pFA6a-VN-kanMX6  | Template for PCR based chromosomal integration of VN (split-Venus) ORF                                | EUROSCARF (Sung and Huh, 2007)                |
| pGEX-6p-1        | for expressing N-terminal GST fusion proteins                                                         | GE Health Care                                |
| pRS426           | 2 $\mu$ m, <i>URA3</i>                                                                                | ATCC                                          |
| pRS426-HEH1      | 2 $\mu$ m, <i>URA3</i> with <i>HEH1</i> ORF                                                           | This study                                    |
| pRS426-HEH2      | 2 $\mu$ m, <i>URA3</i> with <i>HEH2</i> ORF                                                           | This study                                    |
| pUN100-GFP-NUP49 | <i>CEN</i> , <i>LEU2</i> with <i>GFP-NUP49</i> ORF behind control of endogenous <i>NUP49</i> promoter | Gift from R.W. Wozniak                        |
| pYEX-BX          | 2 $\mu$ m, <i>URA3</i> , <i>leu2-d</i>                                                                | Gift from R.W. Wozniak (Marelli et al., 2001) |
| pYEX-BX-NUP53    | 2 $\mu$ m, <i>URA3</i> , <i>leu2-d</i> with <i>NUP53</i> ORF behind control of <i>CUP1</i> promoter   | Gift from R.W. Wozniak (Marelli et al., 2001) |
